1 ***Lactobacilli* in a clade ameliorate age-dependent decline of thermotaxis behavior in *Caenorhabditis***

2 ***elegans***

3

4 **Authors**

5 Satoshi Higurashi<sup>1, 2, #, \*</sup>, Sachio Tsukada<sup>1, 2, \*</sup>, Shunji Nakano<sup>3</sup>, Ikue Mori<sup>3</sup>, and Kentaro

6 Noma<sup>2</sup>

7

8 **Affiliations**

9 1. Milk Science Research Institute, Megmilk Snow Brand Co. Ltd., 1-1-2 Minamidai, Kawagoe, Saitama,  
10 350-1165, Japan

11 2. Group of Nutritional Neuroscience, Neuroscience Institute of the Graduate School of Science, Nagoya  
12 University, Nagoya, 464-8602, Japan

13 3. Group of Molecular Neurobiology, Neuroscience Institute of the Graduate School of Science, Nagoya  
14 University, Nagoya, 464-8602, Japan

15 # Current address: Research and Development Department, Bean Stalk Snow Co., Ltd., 1-1-2 Minamidai,  
16 Kawagoe, Saitama, 350-1165, Japan

17 \*These authors equally contributed to this work.

18

19 **Correspondence to**

20 Kentaro Noma

21 [noma.kentaro@e.mbox.nagoya-u.ac.jp](mailto:noma.kentaro@e.mbox.nagoya-u.ac.jp)

22 **Abstract**

23 Diet is proposed to affect brain aging. However, the causality and mechanism of dietary effects on brain  
24 aging are still unclear due to the long time scales of aging. The nematode *Caenorhabditis elegans* (*C.*  
25 *elegans*) has led aging research because of its short lifespan and easy genetic manipulation. When fed the  
26 standard laboratory diet, *Escherichia coli* (*E. coli*), *C. elegans* experiences an age-dependent decline in  
27 temperature-food associative learning, called thermotaxis. To address if diet ameliorates this decline, we  
28 screened 35 different lactic acid bacteria as alternative diets. We found that *Lactobacilli* in a clade  
29 enriched with heterofermentative bacteria ameliorated age-dependent decline. On the other hand,  
30 homofermentative *Lactobacillus* species did not show this beneficial effect. *Lactobacilli* affected the  
31 thermotaxis of aged animals through DAF-16, an ortholog of mammalian FOXO transcription factor,  
32 while the effect on the thermotaxis was independent of the lifespan and locomotion. Our results  
33 demonstrate that diet can impact brain aging without changing the lifespan and that bacterial screen using  
34 *C. elegans* is a powerful approach to investigate age-dependent behavioral decline.

35

## 36 **Introduction**

37 Human life expectancy has increased since the nineteenth century (Dong, Milholland, & Vijg, 2016),  
38 which has led to the social problem related to age-dependent cognitive dysfunction. Although human  
39 studies suggest that genetic background, diet, and lifestyle might affect brain aging, the possible  
40 mechanism of how they affect brain aging remain unclear (Deary et al., 2009).

41 The nematode *Caenorhabditis elegans* (*C. elegans*) is ideal for addressing the mechanism of age-  
42 related phenotypes because of the two to three-week lifespan and the variety of available genetic tools. In  
43 *C. elegans*, the effect on age-related phenotypes can be readily separable from the organismal lifespan by  
44 directly measuring the lifespan. In the past decades, studies using *C. elegans* have led aging research by  
45 revealing the mechanism of how dietary restriction, insulin-like signaling, and germline stem cells affect  
46 organismal lifespan (Mack, Heimbucher, & Murphy, 2018; Wolff & Dillin, 2006). Like mammals, *C.*  
47 *elegans* experiences age-dependent functional changes in the nervous system (Stein & Murphy, 2012).  
48 Aged worms are defective in locomotion (Mulcahy, Holden-Dye, & O'Connor, 2013), mechanosensory  
49 response (Beck & Rankin, 1993), chemotaxis (Leinwand et al., 2015), thermotaxis (Huang et al., 2020; H.  
50 Murakami, Bessinger, Hellmann, & Murakami, 2005; S. Murakami & Murakami, 2005), and food-  
51 butanone associative learning (Kauffman, Ashraf, Corces-Zimmerman, Landis, & Murphy, 2010).  
52 Emerging evidence suggests that genetic manipulations can prevent age-dependent functional decline in  
53 the *C. elegans* nervous system. The mutation of kynurenic acid synthesizing enzyme *nkat-1* prevents age-  
54 dependent memory decline in the food-butanone association (Vohra, Lemieux, Lin, & Ashrafi, 2018).  
55 Overactivation of  $G\alpha$  signaling in AWC sensory neurons also maintains the ability to form memory in  
56 aged worms in the food-butanone association (Arey, Stein, Kaletsky, Kauffman, & Murphy, 2018).

57 The modification of diet can be easily applicable to our daily lives, compared to genetic  
58 manipulations. Studies in humans and mice imply that diets affect the cognitive decline in aged animals  
59 (Joseph, Cole, Head, & Ingram, 2009; Vauzour et al., 2017). Here, we use *C. elegans* to address the  
60 dietary effect on the age-dependent decline in behavior and its underlying mechanism. In laboratories, *C.*  
61 *elegans* is maintained monoxenically with a uracil auxotroph *Escherichia coli* (*E. coli*) strain, OP50, as

62 the standard diet (Brenner, 1974). On the other hand, *C. elegans* in natural habitat eats a wide variety of  
63 bacteria (Berg et al., 2016; Dirksen et al., 2016; Johnke, Dirksen, & Schulenburg, 2020; Samuel,  
64 Rowedder, Braendle, Felix, & Ruvkun, 2016; Zhang et al., 2017). These bacteria affect the physiology of  
65 *C. elegans*, such as growth rate, reproduction, and sensory behavior (Dirksen et al., 2016; O'Donnell, Fox,  
66 Chao, Schroeder, & Sengupta, 2020; Samuel et al., 2016). However, the effect of different bacteria on  
67 brain aging is unexplored. Among the potential bacterial diet for *C. elegans* in natural habitat (Berg et al.,  
68 2016; Dirksen et al., 2016; Samuel et al., 2016), we focused on Lactic Acid Bacteria (LAB), which are the  
69 most commonly used probiotics for humans (Hill et al., 2014). LAB, such as *Lactobacilli* (*Lb.*) and  
70 *Bifidobacteria* (*B.*), are gram-positive, non-spore-forming bacteria that produce lactic acid from  
71 carbohydrates as the primary metabolic product. Depending on the species, LAB have various effects on  
72 *C. elegans* physiology. *Lb. gasei*, *B. longum*, and *B. infantis* extend lifespan in *C. elegans* (Komura,  
73 Ikeda, Yasui, Saeki, & Nishikawa, 2013; Nakagawa et al., 2016; L. Zhao et al., 2017). On the other hand,  
74 *Lb. helveticus* does not increase the lifespan (Nakagawa et al., 2016). Even in the same species, different  
75 strains have different effects on the lifespan, body size, and locomotion (Wang et al., 2020). In *C.*  
76 *elegans*, LAB modulate evolutionarily conserved genetic pathways such as insulin/insulin-like growth  
77 factor-1 (IGF-1) signaling (IIS) pathway (Grompone et al., 2012; Sugawara & Sakamoto, 2018), which  
78 consists of insulin receptor DAF-2, phosphoinositide 3 (PI3) kinase cascade, and downstream  
79 transcription factor DAF-16 (Lin, Dorman, Rodan, & Kenyon, 1997). DAF-16 is a sole *C. elegans*  
80 ortholog of mammalian FOXO transcription factor and involved in multiple biological processes (Stein &  
81 Murphy, 2012; Tissenbaum, 2018).

82 To comprehensively understand the effect of LAB, we screened 35 different LAB species,  
83 including some subspecies (Table S1). We examined the age-dependent functional decline of thermotaxis  
84 behavior, which reflects associative learning between temperature and food (Hedgecock & Russell, 1975;  
85 Mori & Ohshima, 1995). We demonstrate that *Lactobacilli* in a clade prevent the age-dependent decline  
86 in thermotaxis behavior in *C. elegans*. Among beneficial LAB, we demonstrated that the beneficial effect  
87 of *Lb. reuteri* is dependent on *daf-16*, but independent of the effect on lifespan and locomotion.

## 88 **Results**

### 89 ***C. elegans* thermotaxis behavior declines with age**

90 When cultured with food at a temperature within the physiological range (15~25 °C), *C. elegans* migrates  
91 toward and stays at the cultivation temperature ( $T_{\text{cult}}$ ) on a linear thermal gradient without food (Fig. 1A).  
92 This behavior is called thermotaxis (Hedgecock & Russell, 1975; Mori & Ohshima, 1995). To see the  
93 effect of the standard diet on thermotaxis at different ages, we cultivated worms at 20 °C with an *E. coli*  
94 strain, OP50 (hereafter, *E. coli*), which is the most commonly used diet in the laboratory condition  
95 (Brenner, 1974). When the worms were placed at 17 °C on a temperature gradient without food, young  
96 adults (day 1 of adulthood, D1) migrated up the temperature gradient toward 20 °C (Fig. 1B). On the  
97 other hand, aged worms (day 5 of adulthood, D5) remained around the spotted area and did not reach the  
98 area near  $T_{\text{cult}}$  (Fig. 1B), as previously reported (Huang et al., 2020). To evaluate the ability to perform the  
99 thermotaxis behavior, we defined the performance index, which indicates the fraction of worms around  
100  $T_{\text{cult}}$  (Fig. 1A). The performance index declined from D1 to D5. This low performance is not due to an  
101 inability to move because D5 worms cultivated at 20 °C could migrate down the thermal gradient  
102 relatively normally when the origin was at 23 °C (Fig. 1B, also see below). To further accelerate aging by  
103 cultivating at high temperature (Klass, 1977), we cultured worms at 23 °C and placed them on a  
104 temperature gradient centered at 20 °C (Fig. S1). In this condition, worms gradually lost the ability to  
105 move toward  $T_{\text{cult}}$  (Fig. S2), and the performance index declined during aging from ~0.75 at D1 to ~0.25  
106 at D5 (Fig. 1D). Therefore, we determined to use the thermotaxis behavior of D5 worms cultivated at  
107 23 °C to analyze dietary effects on brain aging.

108

### 109 **Specific LAB prevent the aged-dependent decline of thermotaxis behavior**

110 To address if diet affects the age-dependent decline in thermotaxis behavior, we fed worms with different  
111 LAB species instead of the regular *E. coli* diet. We selected 35 LAB, consisting of 17 *Lactobacilli* (*Lb.*),  
112 two *Pediococci* (*P.*), two *Lactococci* (*Lc.*), two *Streptococci* (*S.*), five *Leuconostoc* (*Ls.*), and seven  
113 *Bifidobacteria* (*B.*) (Table S1). To avoid developmental effects by feeding with LAB, we fed worms with

114 *E. coli* until D1 and fed LAB from D1 to D5 (Fig. 2A). Worms were cultivated at 23 °C and spotted at  
115 20 °C on the thermal gradient for thermotaxis assays (Fig. 2A). Five LAB did not support the survival of  
116 worms during aging (Fig. 2B, NA). Compared to *E. coli*, 22 LAB significantly increased the performance  
117 indices of the aged worms, while eight LAB did not affect them (Fig. 2B). Aged worms fed *P.*  
118 *pentosaceus*, *Lb. reuteri*, *Lb. rhamnosus*, and *Lb. plantarum* showed the highest performance indices,  
119 which are not lower than D1 adults (Fig. 2B). With the temperature gradient of 17-23 °C, aged worms fed  
120 these four LAB migrated to the  $T_{\text{cult}}$ , while *E. coli*-fed aged worms distributed around the spotted area  
121 (Fig. S3A).

122 We first ruled out the possibility that the constitutive thermophilicity caused apparent high  
123 performance indices of LAB-fed worms, irrespective of the association between food and temperature.  
124 Thermophilicity is reported for mutants of genes such as *pkc-1/ttx-4* encoding protein kinase C (Okochi,  
125 Kimura, Ohta, & Mori, 2005) and *tax-6* encoding calcineurin A subunit (Kuhara, Inada, Katsura, & Mori,  
126 2002). To distinguish between associative learning and thermophilicity, we shifted the thermal gradient of  
127 the assay plate from 17-23 °C to 20-26 °C. As previously reported, *tax-6* mutants migrated toward higher  
128 temperature than  $T_{\text{cult}}$  (Fig. S3A). On the other hand, LAB-fed D5 worms crawled around the  $T_{\text{cult}}$  instead  
129 of migrating toward higher temperature (Fig. S3A). To quantitate the thermal preference of worms, we  
130 calculated the thermotaxis index instead of the performance index (Ito, Inada, & Mori, 2006) (Fig. 1A).  
131 Unlike thermophilic *tax-6* mutants, LAB-fed D5 worms did not show higher thermotaxis indices than D1  
132 wild type worms (Fig. S3B), suggesting that LAB-fed D5 worms were not constitutively thermophilic.

133 We next addressed if LAB-fed D5 worms can remember a new temperature by shifting the  $T_{\text{cult}}$   
134 from 23 °C to 17 °C one day before the thermotaxis assay. D1 animals could reset the temperature  
135 memory and migrate toward the new  $T_{\text{cult}}$ , 17 °C (Fig. 3). Compared to D1 worms, *E. coli*-fed D5 worms  
136 responded to the temperature shift marginally (Fig. 3). On the other hand, LAB-fed D5 worms showed a  
137 similar behavioral change to D1 worms (Fig. 3). This result suggests that LAB-fed aged worms retained  
138 the ability to remember the new  $T_{\text{cult}}$ .

139 *C. elegans* shows preference in the bacterial diet (Shtonda & Avery, 2006). In our LAB screen  
140 (Fig. 2B), we used different foods, namely *E. coli* and LAB, during temperature-food association. It  
141 raised the possibility that LAB ameliorated the performance decline by serving as better food than *E. coli*.  
142 To examine this possibility, we switched the diet between *E. coli* and LAB one day before the  
143 thermotaxis assay (Fig. 4A). We used *Lb. reuteri* because it was one of the top hits in our screen and did  
144 not affect the organismal lifespan, as mentioned below. Aged worms whose diet was switched from *Lb.*  
145 *reuteri* to *E. coli* showed the high performance index, while aged worms with the opposite condition did  
146 not. This result ruled out the possibility that the better performance index of *Lb. reuteri*-fed worms was  
147 due to a stronger association between *Lb. reuteri* and temperature and suggests that aged worms can sense  
148 *E. coli* normally and associate it with temperature when fed *Lb. reuteri* during aging.

149 To directly test if *E. coli*-fed aged worms can sense food, we performed a food recognition assay  
150 of aged worms (Sawin, Ranganathan, & Horvitz, 2000). Well-fed young worms slowed their body bends  
151 on the plate with *E. coli* (basal slowing response), and even more so when starved young worms were  
152 placed on the plate with *E. coli* (enhanced slowing response) as previously reported (Fig. 4B) (Sawin et  
153 al., 2000). We found that *E. coli*-fed aged worms also showed normal basal response (Fig. 4C). The food  
154 sensation of aged worms is also reported to be normal using chemotaxis assay with *E. coli* (Cornils et al.,  
155 2016). These results suggest that the low performance in the thermotaxis of aged worms is not due to the  
156 defective sensation of *E. coli* as food. In contrast to the basal slowing response, the enhanced slowing  
157 response in aged worms was not statistically significant (Fig. 4C), implying that aged worms might not  
158 sense starvation normally.

159 Altogether, we concluded that the high performance indices of the aged worms fed some lactic  
160 acid bacteria were not due to the thermophilicity or the different association of the food, but due to better  
161 thermotaxis ability of the aged worms.

162

163 **Effects of LAB on lifespan and locomotion vary**

164 Some LAB extend the lifespan of *C. elegans* (Komura et al., 2013; Nakagawa et al., 2016; Wang et al.,  
165 2020; Y. Zhao et al., 2013). The apparent better performance of LAB-fed aged worms in thermotaxis  
166 might be a consequence of the systemic effects of prolonged organismal lifespan. To test this possibility,  
167 we measured the lifespan of worms fed LAB from D1 which had beneficial effects on thermotaxis of  
168 aged worms (Figs. 2B and 5A): *P. pentosaceus*, *Lb. reuteri*, *Lb. rhamnosus*, and *Lb. plantarum*. We  
169 measured the lifespan of worms fed LAB. To avoid the growth of *E. coli* on LAB plates after transferring  
170 worms, we used peptone-free NGM plates (T. Ikeda, Yasui, Hoshino, Arikawa, & Nishikawa, 2007; Lee,  
171 Kwon, & Lim, 2015) (see Materials and Methods for details). Peptone-free plates did not affect the  
172 beneficial effects of *Lb. reuteri* compared to *E. coli* in thermotaxis of aged worms (Fig. S4). LAB had  
173 various effects on the lifespan of worms: *P. pentosaceus* prolonged the lifespan; *Lb. reuteri* did not affect  
174 the lifespan; *Lb. rhamnosus* and *Lb. plantarum* shortened the lifespan (Fig. 5A). This result suggests that  
175 the beneficial effect of LAB on thermotaxis is not due to prolonged lifespan at least for three among four  
176 selected LAB.

177 We next asked if the beneficial LAB on thermotaxis ameliorated other age-dependent behavioral  
178 decline and assessed the locomotion of aged worms fed selected LAB using two assays: thrashing assay  
179 (Miller et al., 1996) and motility on plates with food. As previously reported (Mulcahy et al., 2013), aged  
180 worms fed *E. coli* showed locomotion defects in both assays (Figs. 5B and 5C). In the thrashing assay,  
181 *Lb. reuteri*- and *Lb. rhamnosus*-fed aged worms showed better locomotion than *E. coli*-fed aged worms,  
182 while *P. pentosaseus* and *Lb. plantarum* did not have effects (Fig. 5B). In the motility assay, *Lb.*  
183 *plantarum*- and *Lb. rhamnosus*-fed aged worms showed reduced locomotion than *E. coli*-fed aged worms,  
184 while *P. pentosaseus* and *Lb. reuteri* did not have effects (Fig. 5C). Thus, the effects of four *Lactobacilli*  
185 on the two locomotion assays varied, although these bacteria had similar effects on thermotaxis,  
186 suggesting that LAB might have different effects on different types of neurons.

187



188 **Beneficial LAB are enriched in a clade of *Lactobacilli***

189 To understand the common feature of LAB strains that ameliorated aged-dependent thermotaxis decline  
190 in our screen, we first observed the morphologies of four top hit strains (Fig. S5). However, their  
191 morphologies and sizes are different from each other; these physical properties of LAB may not explain  
192 high performance indices of aged worms. We next made a phylogenetic tree of 35 LAB strains with the  
193 heatmap of the associated thermotaxis performance indices (Fig. 6A). This analysis revealed that LAB  
194 associated with high performance indices were significantly enriched in a specific clade henceforth  
195 referred to as Clade A (Figs. 6A and 6B). This clade containing *Lactobacilli* and *Pediococci* is enriched in  
196 obligatory and facultatively heterofermentative species except for *P. pentosaceus*, which is obligatory  
197 homofermentative (Fig. 6B). On the other hand, the *Lactobacilli*, which are associated with relatively low  
198 thermotaxis indices (referred to as Clade B), are all homofermentative (Fig. 6B).

199 To get an insight into whether LAB affect worms as live bacteria or serve as nutrition, we  
200 examined the effect of bacteria heat-killed at 65 °C for one hour (Fig. 6C, see Materials and Methods).  
201 Like aged worms fed live bacteria, ones fed heat-killed *E. coli* and heat-killed *Lb. reuteri* showed low and  
202 high performance indices in thermotaxis, respectively. This result suggests that the effect of bacteria on  
203 thermotaxis is independent of the condition of being alive.

204

205 ***daf-16* is involved in the beneficial effect of *Lb. reuteri* in thermotaxis of aged worms**

206 We addressed the molecular mechanism of how worms respond to the LAB diet. LAB can induce dietary  
207 restriction, which leads to a prolonged lifespan (Y. Zhao et al., 2013). *pha-4*, an ortholog of the human  
208 FOXA2 transcription factor, is required for dietary restriction-induced longevity, and its expression is  
209 increased by dietary restriction (Panowski, Wolff, Aguilaniu, Durieux, & Dillin, 2007). In our condition,  
210 *pha-4* expression decreased in LAB-fed aged worms compared to *E. coli*-fed aged worms (Fig. 7A).  
211 Moreover, *eat-2* mutants, which show dietary restriction by defective pharyngeal pumping, did not  
212 increase the performance index of *E. coli*-fed aged worms in thermotaxis (Fig. 7B). These results suggest

213 that dietary restriction on its own does not increase thermotaxis performance in aged worms and that good  
214 thermotaxis performance of LAB-fed aged worms is likely independent from dietary restriction.

215 We next tested several mutants that might be responsible for the beneficial effect of *Lb. reuteri* in  
216 thermotaxis when aged. *nkat-1* and *kmo-1* genes that encode enzymes in the kynurenic acid synthesizing  
217 pathway are known to be involved in butanone-associated memory in aged animals (Vohra et al., 2018);  
218 *daf-16* is an ortholog of mammalian FOXO transcription factor involved in longevity (Kenyon, Chang,  
219 Gensch, Rudner, & Tabtiang, 1993) and LAB-dependent lifespan extension (Grompone et al., 2012; Lee  
220 et al., 2015; Sugawara & Sakamoto, 2018). Aged *nkat-1* and *kmo-1* mutants maintained thermotaxis  
221 ability like wild type when fed *Lb. reuteri*. On the other hand, aged *daf-16* mutants showed significantly  
222 less ability to perform thermotaxis than its D1 counterpart (Fig. 7C); aged *daf-16* mutants fed *Lb. reuteri*  
223 distributed around a temperature slightly lower than the  $T_{\text{cult}}$  (Fig. 7D). This decreased thermotaxis ability  
224 in aged *daf-16* mutants fed *Lb. reuteri* was not due to shortened lifespan because *daf-16* mutants had  
225 comparable lifespan to wild type animals when fed *Lb. reuteri* (Fig. 7E). Collectively, our data implies  
226 that *daf-16* is involved in the effect of *Lb. reuteri* on thermotaxis in aged animals.

227 **Discussion**

228 The causal relationship between diets and their effects on animals' physiology is challenging to address in  
229 humans or mammalian models because microbiota in the gut and diet are complex. It is especially true in  
230 the context of aging because of their long lifespan. Using *C. elegans* as a model, we clearly showed  
231 evidence of the dietary effect on the age-dependent behavioral decline discernible from the lifespan.

232

233 **LAB effects on aging vary among different phenotypes**

234 In this study, we demonstrated that LAB affect the age-dependent decline of associative learning by  
235 ruling out the possibilities that the apparent high performance indices of LAB-fed aged worms were due  
236 to thermophilicity, stronger association to LAB, better motility, or longer lifespan. The major  
237 thermosensory neuron AFD (Mori & Ohshima, 1995) can store temperature memory even when isolated  
238 (Kobayashi et al., 2016). Although Ca<sup>2+</sup> response in AFD is reported to be defective in aged worms  
239 (Huang et al., 2020), the temperature sensation itself does not seem to be abolished in aged worms  
240 because they could migrate down the gradient. AFD thermosensory neurons synapse onto and regulate  
241 AIY interneurons by switching excitatory and inhibitory signals in a context-dependent manner (Mori &  
242 Ohshima, 1995; Nakano et al., 2020; White, Southgate, Thomson, & Brenner, 1986). AIY neurons are  
243 reported to be a cite of action of *age-1* PI3 kinase, which is upstream of *daf-16* in isothermal tracking  
244 behavior (H. Murakami et al., 2005). Given that the beneficial effect of *Lb. reuteri* on thermotaxis of aged  
245 worms is *daf-16*-dependent, *E. coli*-fed aged worms might have defects in AIY interneurons.

246 We found that *E. coli*-fed worms declined the ability to perform thermotaxis during aging more  
247 severely when subjected to migrate up the thermal gradient than when subjected to migrate down the  
248 gradient (Figs. 1B and 1C). Thermotaxis behavior is achieved by multiple steps: sensing temperature,  
249 recognizing food, associating food and temperature, memorizing T<sub>cult</sub>, and migrating toward T<sub>cult</sub> (Aoki &  
250 Mori, 2015; Goodman & Sengupta, 2018; Kimata, Sasakura, Ohnishi, Nishio, & Mori, 2012). Thus, the  
251 different severities of thermotaxis decline between migration up and down the gradient in aged animals  
252 might be attributed to the different neural circuits responsible for migrating up and down the thermal

253 gradient as reported previously (M. Ikeda et al., 2020). Despite the similar beneficial effects of *P.*  
254 *pentosaceus*, *Lb. reuteri*, *Lb. plantarum*, and *Lb. rhamnosus* on thermotaxis in aged worms, these LAB  
255 showed various effects on locomotion, suggesting that the effects of aging vary depending on the neurons.  
256 Even in the same neurons, the functional aging depends on the context (Leinwand et al., 2015).

257       Neuronal aging is also discernible from an organismal lifespan. *nkat-1* mutants prevent age-  
258 dependent memory decline in associative learning between food and butanone without changing lifespan  
259 (Vohra et al., 2018). Similarly, we found that *Lb. reuteri* improved thermotaxis in aged worms without  
260 changing the lifespan. More strikingly, *Lb. plantarum* and *Lb. rhamnosus* shortened the lifespan while  
261 they had beneficial effects on the thermotaxis of D5 adults. This different dietary condition allows us to  
262 address the mechanism underlying phenotypic variation in aged animals independent from organismal  
263 lifespan and genetic perturbation.

264

#### 265 **How do the LAB affect the age-dependent decline in thermotaxis?**

266 Previous reports elucidated how bacterial diet affects *C. elegans* as nutritional components, gut  
267 microbiota, or pathogen (Kumar et al., 2019; J. J. Zhou, Chun, & Liu, 2019). Bacterial diet can change *C.*  
268 *elegans* metabolites (Gao et al., 2017; Reinke, Hu, Sykes, & Lemire, 2010) and gene expression  
269 (MacNeil, Watson, Arda, Zhu, & Walhout, 2013).

270       Both live *E. coli* and LAB can colonize in worms (Berg et al., 2016; Chelliah et al., 2018; Park et  
271 al., 2018; Portal-Celhay, Bradley, & Blaser, 2012). Live bacteria are necessary for some physiological  
272 roles; secreted enterobactin from live *E. coli* in the gut promotes *C. elegans* growth (Qi & Han, 2018);  
273 live, but not dead, LAB reduced the susceptibility to pathogenic bacteria *Pseudomonas aeruginosa*. On  
274 the other hand, live bacteria are unnecessary in different contexts; heat-killed *Lb. paracasei* and  
275 *Bifidobacterium longum* extend *C. elegans* lifespan (Sugawara & Sakamoto, 2018; Wang et al., 2020). In  
276 our thermotaxis assay on aged worms, *E. coli* and LAB killed by 65 °C treatment had similar effects to  
277 live bacteria. This result implies that, instead of live bacteria, heat-resistant metabolites might be  
278 responsible for the effect on thermotaxis of aged *C. elegans*. Metabolites in bacterial diet affect *C.*

279 *elegans* physiology; some metabolites are beneficial, while others are toxic (J. J. Zhou et al., 2019).  
280 Coenzyme Q in *E. coli* shortens the lifespan of *C. elegans* (Larsen & Clarke, 2002). Bacterial nitric oxide  
281 and folate also positively and negatively regulate *C. elegans* lifespan, respectively (Gusarov et al., 2013;  
282 Virk et al., 2012). Vitamin 12 in *Comamonas aquatica* accelerates development and reduces fertility  
283 without changing lifespan (Watson et al., 2014). Given that different metabolites are produced by  
284 different LAB (Tomita, Saito, Nakamura, Sekiyama, & Kikuchi, 2017), these metabolites might be  
285 responsible for the different effects on the thermotaxis of aged *C. elegans*.

286 Our results indicated that LAB associated with high performance indices of thermotaxis are  
287 associated with a clade enriched in heterofermentative *Lactobacilli* and *Pediococci* (Clade A in Figure  
288 5A). Heterofermentative LAB produce not only lactic acid and ATP but also several other end products  
289 such as ethanol and CO<sub>2</sub> from glucose. On the other hand, homofermentative LAB convert glucose into  
290 two molecules of lactic acid and ATP. Heterolactic fermentation itself does not explain high performance  
291 index in thermotaxis of aged worms because heterofermentative *Leuconostoc* and *Bifidobacteria* species  
292 did not give high performance indices. Metabolites other than lactic acid, ethanol, and CO<sub>2</sub> are also  
293 different between hetero- and homofermentative *Lactobacilli* (Tomita et al., 2017). Metabolites enriched  
294 in heterofermentative *Lactobacilli* include a neurotransmitter GABA and tyramine, a substrate to  
295 synthesize neurotransmitter octopamine. We note that Tomita *et al.* reported the metabolites in the media  
296 (Tomita et al., 2017) while we supply bacteria to worms after washing off the bacterial media.  
297 Nonetheless, metabolites enriched in heterofermentative *Lactobacilli* are possibly beneficial effects on the  
298 age-dependent decline in thermotaxis.

299

### 300 **Diets modulate genetic pathways in *C. elegans***

301 LAB can extend the lifespan of *C. elegans* either by dietary restriction-dependent (Y. Zhao et al., 2013) or  
302 by dietary restriction-independent mechanisms (Komura et al., 2013; Nakagawa et al., 2016). The  
303 mechanism underlying the beneficial effect on the thermotaxis of aged worms does not seem to depend on  
304 the activation of the dietary restriction pathway by the LAB. First, the expression of *pha-4* was low.

305 Second, the lifespan of LAB-fed worms was not necessarily prolonged. Third, *eat-2* mutants, which  
306 mimic dietary restriction, did not improve thermotaxis in aged worms fed *E. coli*. Fourth, *kmo-1* and *nkat-*  
307 *1* genes, which are involved in dietary restriction-dependent beneficial effects on associative learning  
308 (Vohra, Lemieux, Lin, & Ashrafi, 2017), did not affect the dietary effects on thermotaxis of aged worms.

309 Different LAB activate distinct genetic pathways such as insulin and IGF-1 signaling (IIS)  
310 pathway important for lifespan regulation and p38 mitogen-activated protein kinase (MAPK) pathway  
311 important for innate immunity. *Lb. rhamnosus* and *B. longum* extend the lifespan of *C. elegans* by  
312 modulating the IIS pathway consisting of DAF-2 and DAF-16 (Grompone et al., 2012; Sugawara &  
313 Sakamoto, 2018). *B. infantis* extends the lifespan of *C. elegans* via the PMK-1 p38 MAPK pathway and a  
314 downstream transcription factor SKN-1, an ortholog of mammalian Nrf, but not via DAF-16 (Komura et  
315 al., 2013). The PMK-1 pathway is also activated by *Lb. acidophilus* and *Lactobacillus fermentum* (Kim &  
316 Mylonakis, 2012; Park et al., 2018). Worms fed a lactic acid bacteria, *Weissella*, show higher expression  
317 of *daf-16*, *aak-2*, and *jnk-1*, and extend lifespan in these genes-dependent manners (Lee et al., 2015). In  
318 our results, *daf-16* was dispensable in thermotaxis at D1, but necessary for beneficial effects of *Lb. reuteri*  
319 at D5, suggesting a specific role in the LAB's effects on aged worms. Given that *daf-16* has neuron-  
320 specific targets (Kaletsky et al., 2016), differential expressions of these genes with different diets can  
321 affect thermotaxis behavior. As discussed above, *daf-16* might function in AIY interneurons (H.  
322 Murakami et al., 2005). Since the distal part of the neurites of AIY, which mainly contain postsynapses  
323 (White et al., 1986), are truncated in *daf-16* mutants (Christensen, de la Torre-Ubieta, Bonni, & Colon-  
324 Ramos, 2011), defective transmission from AFD sensory neurons to AIY interneurons might be  
325 manifested in behavior in the *Lb. reuteri*-fed D5 condition.

326

### 327 **Bacterial screen to address age-dependent phenotypes**

328 Even with *C. elegans* with a short lifespan, it is challenging to address age-dependent neuronal  
329 phenotypes because powerful forward genetic screens are not readily applicable to aged worms. Our  
330 study showed that bacterial screen is useful for generating phenotypic diversity and address underlying

331 molecular mechanisms in aged animals. The bacterial screen has been applied to various *C. elegans*  
332 phenotypes. Watson *et al.* carried out unbiased mutant screens of *Escherichia coli* and *Comamonas*  
333 *aquatica* to identify bacterial genes that affect the “dietary sensor” in *C. elegans*, which increases the GFP  
334 intensity when fed *Comamonas*; they found that mutations in genes involved in vitamin B12  
335 biosynthesis/import increased *C. elegans* dietary sensor activity (Watson *et al.*, 2014). Zhou *et al.*  
336 screened 13 LAB and found that *Lactobacillus zae* protects *C. elegans* from enterotoxigenic *E. coli* (M.  
337 Zhou *et al.*, 2014). Given that *C. elegans* has its natural microbiota (Berg *et al.*, 2016; Dirksen *et al.*,  
338 2016; Samuel *et al.*, 2016; Zhang *et al.*, 2017), the nervous system of worms in a natural environment  
339 may be affected by complex bacteria. Indeed, a recent study has revealed that tyramine produced from  
340 commensal bacteria affect *C. elegans* avoidance behavior (O'Donnell *et al.*, 2020). Hence, bacterial  
341 screens will provide a unique angle of understanding for *C. elegans* research.  
342

343 **Materials and Methods**

344

345 **Worm maintenance and strains**

346 *C. elegans* strains were maintained at 23°C on Nematode Growth Medium (NGM) plates with *E. coli*,  
347 OP50, as previously reported (Brenner, 1974). N2 (Bristol) was used as the wild type. The following  
348 mutant strains were used for thermotaxis assays: DA1116 *eat-2(ad1116)*; CF1038 *daf-16(mu86)*; IK0656  
349 *tax-6(db60)*; NUJ69 *kmo-1(tm4529)*; NUJ71 *nkat-1(ok566)*. NUJ69 *kmo-1(tm4529)* is a one-time  
350 outcrossed FX04529 *kmo-1(tm4529)* strain. NUJ71 *nkat-1(ok566)* is a two-time outcrossed RB784 *nkat-*  
351 *1(ok566)* strain.

352

353 **Preparation of bacterial plates**

354 *E. coli*, OP50, was inoculated into Luria-Bertani (LB) broth, cultured overnight at 37 °C. LAB strains  
355 were provided by Megmilk Snow Brand company (Table S1). Bacteria were inoculated into the liquid  
356 medium from glycerol stocks and cultured in the conditions described in Supplementary Table 1.  
357 Bacterial cells were collected by centrifugation at 7,000x g for 10 min at 4 °C. Cells were washed twice  
358 with sterile 0.9% NaCl solution. The washed bacteria were adjusted to a final concentration of 0.1 g/ml  
359 (wet weight) in NG buffer (25 mM K-PO<sub>4</sub> (pH6), 50mM NaCl, 1 mM CaCl<sub>2</sub>, 1 mM MgSO<sub>4</sub>). For heat  
360 killing, 0.1 g/ml bacteria in tubes were incubated for 1 h in a 65 °C incubator for *E. coli* or in boiling  
361 water for LAB. By this treatment, bacterial colony-forming unit (cfu) became <1.0x10<sup>2</sup> cfu/ml, which is  
362 at least 10<sup>8</sup> lower than live bacteria (>1.5x10<sup>10</sup>). Two hundred microliters of the bacterial suspension were  
363 spread onto 60-mm NGM plates and dried overnight. NGM plates with peptone were used except for  
364 lifespan assays, where NGM plates without peptone were used.

365

366 **Preparation of aged worms fed different bacteria**

367 For behavioral assays, synchronized eggs were prepared by bleaching gravid hermaphrodites using 0.5x  
368 household bleach in 0.5 M NaOH and placed onto NGM plates with OP50. The eggs were cultured at



369 23 °C for 72 hours to obtain day one adults (D1) unless otherwise noted. For thermotaxis of aged worms,  
370 day one worms were washed with M9 and transferred to NGM plates with OP50 or LAB every day. For  
371 thrashing assay and locomotion assay, worms were transferred individually by picking.

372

### 373 **Thermotaxis assay**

374 Population thermotaxis assays were performed as described (Ito et al., 2006). Fifty to 250 worms on  
375 cultured plates were washed with M9 and placed at the center of the assay plates without food and with a  
376 temperature gradient of 17-23 or 20-26 °C. The temperature gradient was measured to be ~0.5 °C/cm.  
377 After letting them move for 1 h, the number of adult worms in each of eight sections along the  
378 temperature gradient (Fig. 1A) was scored under a stereomicroscope. The fraction of worms in each  
379 section was plotted on histograms. The performance index and thermotaxis index were calculated, as  
380 shown in Fig. 1A.

381

### 382 **Thrashing assay**

383 Thrashing assay was performed, as previously described with a few modifications (Tsalik & Hobert,  
384 2003). Worms were washed with NG buffer and transferred with a drop of NG buffer onto an NGM plate  
385 without food using a capillary pipet. In liquid, worms show lateral swimming movements (thrashes). We  
386 defined a single thrash as a complete movement through the midpoint and back and counted the number  
387 of thrashes for 30 seconds.

388

### 389 **Motility assay**

390 Assay plates were prepared by placing circular filter paper with a one-inch hole on NGM plates with  
391 OP50 or LAB and soaking the paper with ~100 µl of 100 mM CuCl<sub>2</sub>. A single worm was transferred to an  
392 assay plate with the cultured bacteria and left at 23 °C for three minutes. The images of the bacterial lawn  
393 were captured by a digital camera (Fujifilm) through an eyepiece of a stereomicroscope, Stemi 508  
394 (Zeiss). The trajectory of a worm on the lawn was traced using FIJI (Schindelin et al., 2012) and

395 measured as the distance of locomotion. The distance (mm) was divided by time (min) to calculate the  
396 speed.

397

### 398 **Food recognition assay**

399 Food recognition assay was performed as previously described with a few modifications (Sawin et al.,  
400 2000). Assay plates were prepared by spreading OP50, as described for worm maintenance. For well-fed  
401 animals, worms were washed twice in S basal buffer (Brenner, 1974), and transferring them to an assay  
402 plate in a drop of the buffer using a capillary pipette. Five minutes after transfer, the number of body  
403 bends in 20 s intervals was counted. For starved animals, 5–15 animals were washed twice in S basal  
404 buffer and incubated on NGM plates without food for 30 min. The number of body bends was measured  
405 as described above for well-fed animals.

406

### 407 **Lifespan assay**

408 Worms were synchronized by bleaching gravid adults and grown with regular NGM plates with OP50  
409 until day 1 of adulthood. Day1 adults were washed three times with M9 buffer and transferred to peptone-  
410 free NGM plates supplemented with 50 mg/ml OP50 or LAB. Worms were transferred to new plates  
411 every day until they became D4 adults, and every other day afterward. Dead worms were defined as no  
412 voluntary movement after several touches on the head and tail and counted every day. Four independent  
413 sessions with 25 worms per session were combined for each condition.

414

### 415 **Quantitative RT-PCR**

416 Non-gravid young adult worms were used as D1 to avoid contamination of eggs. D5 worms fed *E. coli* or  
417 LAB were prepared as described above. Total RNA was extracted from whole worms using RNAiso Plus  
418 reagent (Takara). Two micrograms of total RNA were reverse transcribed into cDNA with a mixture of  
419 random and oligo dT primers using ReverTra Ace qPCR RT Master Mix with gDNA Remover  
420 (TOYOBO). The cDNA and gene-specific primers were used for qPCR reaction with THUNDERBIRD

421 SYBR qPCR Mix (TOYOBO), and the products were detected using a LightCycler 96 System (Roche).  
422 The following primers were used: *pha-4* (KN1370: 5'-GGTTGCCAGGTCCCCTGACA-3' and KN1371:  
423 5'-GCCTACGGAGGTAGCATCCA-3'); *cdc-42* is used as a reference because it is stable and unaltered  
424 during aging (Hoogewijs, Houthoofd, Matthijssens, Vandesompele, & Vanfleteren, 2008; Mann, Van  
425 Nostrand, Friedland, Liu, & Kim, 2016) (KN1170: 5'-CTGCTGGACAGGAAGATTACG-3' and  
426 KN1171: 5'-CTCGGACATTCTCGAATGAAG-3').

427

### 428 **Phylogenetic tree**

429 16S rRNA sequences of LAB were obtained from the Genome database of NCBI  
430 (<http://www.ncbi.nlm.nih.gov/genome/>), and the accession numbers are shown in Table S2. The  
431 phylogenetic tree was inferred by the Neighbor-Joining method based on the 16S rRNA gene sequence of  
432 model LAB strains. The evolutionary distances were computed using the Maximum Composite  
433 Likelihood method conducted in MEGA X.

434

### 435 **Gram staining**

436 Bacteria are fixed with methanol and stained using Gram Color Kit (Muto Pure Chemicals Co., Ltd.,  
437 Tokyo, Japan). Stained bacteria are imaged using an Axio Imager.A2 equipped with a Plan-Apochromat  
438 63x/1.4 oil objective (Zeiss).

439

### 440 **Statistical analyses**

441 Box-and-whisker plots represent medians as center lines; boxes as first and third quartiles; whiskers as  
442 maximum and minimum values except for outliers, which are 1.5 times greater than the upper limit or 1.5  
443 times smaller than the lower limit of the interquartile range; dots as outliers. We used Student's t-test to  
444 compare two samples and one-way or two-way ANOVA followed by Dunnett's test to compare multiple  
445 samples using R (R core team, <https://www.R-project.org/>, Vienna, Austria) or GraphPad Prism 7.0

446 (GraphPad Software, La Jolla, CA). In all figures, \* $p < 0.05$ , \*\* $p < 0.01$ , and  $p > 0.05$  is considered as not  
447 significant (ns).

#### 448 **Acknowledgments**

449 We thank members of the Nutritional Neuroscience laboratory and the Mori laboratory for their  
450 comments on the manuscript. Some strains were provided by the CGC, which is funded by the NIH  
451 Office of Research Infrastructure Programs (P40 OD010440) and by the Mitani laboratory of the National  
452 Bioresource Project of Japan.

453

#### 454 **Competing interests**

455 S.H. is an employee of Bean Stalk Snow Co., Ltd., and S.T. is an employee of Megmilk Snow Brand Co.,  
456 Ltd. The other authors declare no competing interests.

#### 457 **References**

- 458 Aoki, I., & Mori, I. (2015). Molecular biology of thermosensory transduction in *C. elegans*. *Curr Opin*  
459 *Neurobiol*, 34, 117-124. doi:S0959-4388(15)00066-5 [pii]  
460 10.1016/j.conb.2015.03.011
- 461 Arey, R. N., Stein, G. M., Kaletsky, R., Kauffman, A., & Murphy, C. T. (2018). Activation of Galphaq  
462 Signaling Enhances Memory Consolidation and Slows Cognitive Decline. *Neuron*, 98(3), 562-  
463 574 e565. doi:10.1016/j.neuron.2018.03.039
- 464 Beck, C. D., & Rankin, C. H. (1993). Effects of aging on habituation in the nematode *Caenorhabditis*  
465 *elegans*. *Behav Processes*, 28(3), 145-163. doi:10.1016/0376-6357(93)90088-9
- 466 Berg, M., Stenuit, B., Ho, J., Wang, A., Parke, C., Knight, M., . . . Shapira, M. (2016). Assembly of the  
467 *Caenorhabditis elegans* gut microbiota from diverse soil microbial environments. *ISME J*, 10(8),  
468 1998-2009. doi:10.1038/ismej.2015.253

- 469 Brenner, S. (1974). The genetics of *Caenorhabditis elegans*. *Genetics*, 77(1), 71-94.
- 470 Chelliah, R., Choi, J. G., Hwang, S. B., Park, B. J., Daliri, E. B., Kim, S. H., . . . Oh, D. H. (2018). In  
471 vitro and in vivo defensive effect of probiotic LAB against *Pseudomonas aeruginosa* using  
472 *Caenorhabditis elegans* model. *Virulence*, 9(1), 1489-1507. doi:10.1080/21505594.2018.1518088
- 473 Christensen, R., de la Torre-Ubieta, L., Bonni, A., & Colon-Ramos, D. A. (2011). A conserved  
474 PTEN/FOXO pathway regulates neuronal morphology during *C. elegans* development.  
475 *Development*, 138(23), 5257-5267. doi:10.1242/dev.069062
- 476 Cornils, A., Maurya, A. K., Tereshko, L., Kennedy, J., Brear, A. G., Prahlad, V., . . . Sengupta, P. (2016).  
477 Structural and Functional Recovery of Sensory Cilia in *C. elegans* IFT Mutants upon Aging.  
478 *PLoS Genet*, 12(12), e1006325. doi:10.1371/journal.pgen.1006325
- 479 Deary, I. J., Corley, J., Gow, A. J., Harris, S. E., Houlihan, L. M., Marioni, R. E., . . . Starr, J. M. (2009).  
480 Age-associated cognitive decline. *Br Med Bull*, 92, 135-152. doi:10.1093/bmb/ldp033
- 481 Dirksen, P., Marsh, S. A., Braker, I., Heitland, N., Wagner, S., Nakad, R., . . . Schulenburg, H. (2016).  
482 The native microbiome of the nematode *Caenorhabditis elegans*: gateway to a new host-  
483 microbiome model. *BMC Biol*, 14, 38. doi:10.1186/s12915-016-0258-1
- 484 Dong, X., Milholland, B., & Vijg, J. (2016). Evidence for a limit to human lifespan. *Nature*, 538(7624),  
485 257-259. doi:10.1038/nature19793
- 486 Gao, A. W., Chatzisprou, I. A., Kamble, R., Liu, Y. J., Herzog, K., Smith, R. L., . . . Houtkooper, R. H.  
487 (2017). A sensitive mass spectrometry platform identifies metabolic changes of life history traits  
488 in *C. elegans*. *Sci Rep*, 7(1), 2408. doi:10.1038/s41598-017-02539-w
- 489 Goodman, M. B., & Sengupta, P. (2018). The extraordinary AFD thermosensor of *C. elegans*. *Pflugers*  
490 *Arch*, 470(5), 839-849. doi:10.1007/s00424-017-2089-5
- 491 Grompone, G., Martorell, P., Llopis, S., Gonzalez, N., Genoves, S., Mulet, A. P., . . . Ramon, D. (2012).  
492 Anti-inflammatory *Lactobacillus rhamnosus* CNCM I-3690 strain protects against oxidative  
493 stress and increases lifespan in *Caenorhabditis elegans*. *PLoS ONE*, 7(12), e52493.  
494 doi:10.1371/journal.pone.0052493

- 495 Gusarov, I., Gautier, L., Smolentseva, O., Shamovsky, I., Eremina, S., Mironov, A., & Nudler, E. (2013).  
496 Bacterial nitric oxide extends the lifespan of *C. elegans*. *Cell*, 152(4), 818-830.  
497 doi:10.1016/j.cell.2012.12.043
- 498 Hedgecock, E. M., & Russell, R. L. (1975). Normal and mutant thermotaxis in the nematode  
499 *Caenorhabditis elegans*. *Proc Natl Acad Sci U S A*, 72(10), 4061-4065.
- 500 Hill, C., Guarner, F., Reid, G., Gibson, G. R., Merenstein, D. J., Pot, B., . . . Sanders, M. E. (2014).  
501 Expert consensus document. The International Scientific Association for Probiotics and  
502 Prebiotics consensus statement on the scope and appropriate use of the term probiotic. *Nat Rev*  
503 *Gastroenterol Hepatol*, 11(8), 506-514. doi:10.1038/nrgastro.2014.66
- 504 Hoogewijs, D., Houthoofd, K., Matthijssens, F., Vandesompele, J., & Vanfleteren, J. R. (2008). Selection  
505 and validation of a set of reliable reference genes for quantitative sod gene expression analysis in  
506 *C. elegans*. *BMC Mol Biol*, 9, 9. doi:10.1186/1471-2199-9-9  
507 1471-2199-9-9 [pii]
- 508 Huang, T. T., Matsuyama, H. J., Tsukada, Y., Singhvi, A., Syu, R. T., Lu, Y., . . . Pan, C. L. (2020). Age-  
509 dependent changes in response property and morphology of a thermosensory neuron and  
510 thermotaxis behavior in *Caenorhabditis elegans*. *Aging Cell*. doi:10.1111/accel.13146
- 511 Ikeda, M., Nakano, S., Giles, A. C., Xu, L., Costa, W. S., Gottschalk, A., & Mori, I. (2020). Context-  
512 dependent operation of neural circuits underlies a navigation behavior in *Caenorhabditis elegans*.  
513 *Proc Natl Acad Sci U S A*, 117(11), 6178-6188. doi:10.1073/pnas.1918528117
- 514 Ikeda, T., Yasui, C., Hoshino, K., Arikawa, K., & Nishikawa, Y. (2007). Influence of lactic acid bacteria  
515 on longevity of *Caenorhabditis elegans* and host defense against salmonella enterica serovar  
516 enteritidis. *Appl Environ Microbiol*, 73(20), 6404-6409. doi:10.1128/AEM.00704-07
- 517 Ito, H., Inada, H., & Mori, I. (2006). Quantitative analysis of thermotaxis in the nematode *Caenorhabditis*  
518 *elegans*. *J Neurosci Methods*, 154(1-2), 45-52. doi:10.1016/j.jneumeth.2005.11.011

- 519 Johnke, J., Dirksen, P., & Schulenburg, H. (2020). Community assembly of the native *C. elegans*  
520 microbiome is influenced by time, substrate and individual bacterial taxa. *Environ Microbiol*,  
521 22(4), 1265-1279. doi:10.1111/1462-2920.14932
- 522 Joseph, J., Cole, G., Head, E., & Ingram, D. (2009). Nutrition, brain aging, and neurodegeneration. *J*  
523 *Neurosci*, 29(41), 12795-12801. doi:10.1523/JNEUROSCI.3520-09.2009
- 524 Kaletsky, R., Lakhina, V., Arey, R., Williams, A., Landis, J., Ashraf, J., & Murphy, C. T. (2016). The *C.*  
525 *elegans* adult neuronal IIS/FOXO transcriptome reveals adult phenotype regulators. *Nature*,  
526 529(7584), 92-96. doi:10.1038/nature16483  
527 nature16483 [pii]
- 528 Kauffman, A. L., Ashraf, J. M., Corces-Zimmerman, M. R., Landis, J. N., & Murphy, C. T. (2010).  
529 Insulin signaling and dietary restriction differentially influence the decline of learning and  
530 memory with age. *PLoS Biol*, 8(5), e1000372. doi:10.1371/journal.pbio.1000372
- 531 Kenyon, C., Chang, J., Gensch, E., Rudner, A., & Tabtiang, R. (1993). A *C. elegans* mutant that lives  
532 twice as long as wild type. *Nature*, 366(6454), 461-464. doi:10.1038/366461a0
- 533 Kim, Y., & Mylonakis, E. (2012). *Caenorhabditis elegans* immune conditioning with the probiotic  
534 bacterium *Lactobacillus acidophilus* strain NCFM enhances gram-positive immune responses.  
535 *Infect Immun*, 80(7), 2500-2508. doi:10.1128/IAI.06350-11
- 536 Kimata, T., Sasakura, H., Ohnishi, N., Nishio, N., & Mori, I. (2012). Thermotaxis of *C. elegans* as a  
537 model for temperature perception, neural information processing and neural plasticity. *Worm*,  
538 1(1), 31-41. doi:10.4161/worm.19504
- 539 Klass, M. R. (1977). Aging in the nematode *Caenorhabditis elegans*: major biological and environmental  
540 factors influencing life span. *Mech Ageing Dev*, 6(6), 413-429.
- 541 Kobayashi, K., Nakano, S., Amano, M., Tsuboi, D., Nishioka, T., Ikeda, S., . . . Mori, I. (2016). Single-  
542 Cell Memory Regulates a Neural Circuit for Sensory Behavior. *Cell Rep*, 14(1), 11-21.  
543 doi:10.1016/j.celrep.2015.11.064  
544 S2211-1247(15)01420-5 [pii]

- 545 Komura, T., Ikeda, T., Yasui, C., Saeki, S., & Nishikawa, Y. (2013). Mechanism underlying prolongevity  
546 induced by bifidobacteria in *Caenorhabditis elegans*. *Biogerontology*, *14*(1), 73-87.  
547 doi:10.1007/s10522-012-9411-6
- 548 Kuhara, A., Inada, H., Katsura, I., & Mori, I. (2002). Negative regulation and gain control of sensory  
549 neurons by the *C. elegans* calcineurin TAX-6. *Neuron*, *33*(5), 751-763. doi:10.1016/s0896-  
550 6273(02)00607-4
- 551 Kumar, A., Baruah, A., Tomioka, M., Iino, Y., Kalita, M. C., & Khan, M. (2019). *Caenorhabditis*  
552 *elegans*: a model to understand host-microbe interactions. *Cell Mol Life Sci*. doi:10.1007/s00018-  
553 019-03319-7
- 554 Larsen, P. L., & Clarke, C. F. (2002). Extension of life-span in *Caenorhabditis elegans* by a diet lacking  
555 coenzyme Q. *Science*, *295*(5552), 120-123. doi:10.1126/science.1064653
- 556 Lee, J., Kwon, G., & Lim, Y. H. (2015). Elucidating the Mechanism of *Weissella*-dependent Lifespan  
557 Extension in *Caenorhabditis elegans*. *Sci Rep*, *5*, 17128. doi:10.1038/srep17128
- 558 Leinwand, S. G., Yang, C. J., Bazopoulou, D., Chronis, N., Srinivasan, J., & Chalasani, S. H. (2015).  
559 Circuit mechanisms encoding odors and driving aging-associated behavioral declines in  
560 *Caenorhabditis elegans*. *Elife*, *4*, e10181. doi:10.7554/eLife.10181
- 561 Lin, K., Dorman, J. B., Rodan, A., & Kenyon, C. (1997). *daf-16*: An HNF-3/forkhead family member that  
562 can function to double the life-span of *Caenorhabditis elegans*. *Science*, *278*(5341), 1319-1322.  
563 doi:10.1126/science.278.5341.1319
- 564 Mack, H. I. D., Heimbucher, T., & Murphy, C. T. (2018). The nematode *Caenorhabditis elegans* as a  
565 model for aging research. *Drug Discov Today Dis Model.*, *27*, 3-13.
- 566 MacNeil, L. T., Watson, E., Arda, H. E., Zhu, L. J., & Walhout, A. J. (2013). Diet-induced developmental  
567 acceleration independent of TOR and insulin in *C. elegans*. *Cell*, *153*(1), 240-252.  
568 doi:10.1016/j.cell.2013.02.049



- 569 Mann, F. G., Van Nostrand, E. L., Friedland, A. E., Liu, X., & Kim, S. K. (2016). Deactivation of the  
570 GATA Transcription Factor ELT-2 Is a Major Driver of Normal Aging in *C. elegans*. *PLoS*  
571 *Genet*, 12(4), e1005956. doi:10.1371/journal.pgen.1005956
- 572 Miller, K. G., Alfonso, A., Nguyen, M., Crowell, J. A., Johnson, C. D., & Rand, J. B. (1996). A genetic  
573 selection for *Caenorhabditis elegans* synaptic transmission mutants. *Proc Natl Acad Sci U S A*,  
574 93(22), 12593-12598.
- 575 Mori, I., & Ohshima, Y. (1995). Neural regulation of thermotaxis in *Caenorhabditis elegans*. *Nature*,  
576 376(6538), 344-348.
- 577 Mulcahy, B., Holden-Dye, L., & O'Connor, V. (2013). Pharmacological assays reveal age-related changes  
578 in synaptic transmission at the *Caenorhabditis elegans* neuromuscular junction that are modified  
579 by reduced insulin signalling. *J Exp Biol*, 216(Pt 3), 492-501. doi:10.1242/jeb.068734
- 580 Murakami, H., Bessinger, K., Hellmann, J., & Murakami, S. (2005). Aging-dependent and -independent  
581 modulation of associative learning behavior by insulin/insulin-like growth factor-1 signal in  
582 *Caenorhabditis elegans*. *J Neurosci*, 25(47), 10894-10904. doi:10.1523/JNEUROSCI.3600-  
583 04.2005
- 584 Murakami, S., & Murakami, H. (2005). The effects of aging and oxidative stress on learning behavior in  
585 *C. elegans*. *Neurobiol Aging*, 26(6), 899-905. doi:10.1016/j.neurobiolaging.2004.08.007
- 586 Nakagawa, H., Shiozaki, T., Kobatake, E., Hosoya, T., Moriya, T., Sakai, F., . . . Miyazaki, T. (2016).  
587 Effects and mechanisms of prolongevity induced by *Lactobacillus gasseri* SBT2055 in  
588 *Caenorhabditis elegans*. *Aging Cell*, 15(2), 227-236. doi:10.1111/accel.12431
- 589 Nakano, S., Ikeda, M., Tsukada, Y., Fei, X., Suzuki, T., Niino, Y., . . . Mori, I. (2020). Presynaptic MAST  
590 kinase controls opposing postsynaptic responses to convey stimulus valence in *Caenorhabditis*  
591 *elegans*. *Proc Natl Acad Sci U S A*, 117(3), 1638-1647. doi:10.1073/pnas.1909240117
- 592 O'Donnell, M. P., Fox, B. W., Chao, P. H., Schroeder, F. C., & Sengupta, P. (2020). A neurotransmitter  
593 produced by gut bacteria modulates host sensory behaviour. *Nature*. doi:10.1038/s41586-020-  
594 2395-5

- 595 Okochi, Y., Kimura, K. D., Ohta, A., & Mori, I. (2005). Diverse regulation of sensory signaling by *C.*  
596 *elegans* nPKC-epsilon/eta TTX-4. *Embo J*, 24(12), 2127-2137. doi:10.1038/sj.emboj.7600697
- 597 Panowski, S. H., Wolff, S., Aguilaniu, H., Durieux, J., & Dillin, A. (2007). PHA-4/Foxa mediates diet-  
598 restriction-induced longevity of *C. elegans*. *Nature*, 447(7144), 550-555.  
599 doi:10.1038/nature05837
- 600 Park, M. R., Ryu, S., Maburutse, B. E., Oh, N. S., Kim, S. H., Oh, S., . . . Kim, Y. (2018). Probiotic  
601 *Lactobacillus fermentum* strain JDFM216 stimulates the longevity and immune response of  
602 *Caenorhabditis elegans* through a nuclear hormone receptor. *Sci Rep*, 8(1), 7441.  
603 doi:10.1038/s41598-018-25333-8
- 604 Portal-Celhay, C., Bradley, E. R., & Blaser, M. J. (2012). Control of intestinal bacterial proliferation in  
605 regulation of lifespan in *Caenorhabditis elegans*. *BMC Microbiol*, 12, 49. doi:10.1186/1471-  
606 2180-12-49
- 607 Qi, B., & Han, M. (2018). Microbial Siderophore Enterobactin Promotes Mitochondrial Iron Uptake and  
608 Development of the Host via Interaction with ATP Synthase. *Cell*, 175(2), 571-582 e511.  
609 doi:10.1016/j.cell.2018.07.032
- 610 Reinke, S. N., Hu, X., Sykes, B. D., & Lemire, B. D. (2010). *Caenorhabditis elegans* diet significantly  
611 affects metabolic profile, mitochondrial DNA levels, lifespan and brood size. *Mol Genet Metab*,  
612 100(3), 274-282. doi:10.1016/j.ymgme.2010.03.013
- 613 Samuel, B. S., Rowedder, H., Braendle, C., Felix, M. A., & Ruvkun, G. (2016). *Caenorhabditis elegans*  
614 responses to bacteria from its natural habitats. *Proc Natl Acad Sci U S A*, 113(27), E3941-3949.  
615 doi:10.1073/pnas.1607183113
- 616 Sawin, E. R., Ranganathan, R., & Horvitz, H. R. (2000). *C. elegans* locomotory rate is modulated by the  
617 environment through a dopaminergic pathway and by experience through a serotonergic pathway.  
618 *Neuron*, 26(3), 619-631.

- 619 Schindelin, J., Arganda-Carreras, I., Frise, E., Kaynig, V., Longair, M., Pietzsch, T., . . . Cardona, A.  
620 (2012). Fiji: an open-source platform for biological-image analysis. *Nat Methods*, 9(7), 676-682.  
621 doi:10.1038/nmeth.2019  
622 nmeth.2019 [pii]
- 623 Shtonda, B. B., & Avery, L. (2006). Dietary choice behavior in *Caenorhabditis elegans*. *J Exp Biol*,  
624 209(Pt 1), 89-102. doi:10.1242/jeb.01955
- 625 Stein, G. M., & Murphy, C. T. (2012). The Intersection of Aging, Longevity Pathways, and Learning and  
626 Memory in *C. elegans*. *Front Genet*, 3, 259. doi:10.3389/fgene.2012.00259
- 627 Sugawara, T., & Sakamoto, K. (2018). Killed *Bifidobacterium longum* enhanced stress tolerance and  
628 prolonged life span of *Caenorhabditis elegans* via DAF-16. *Br J Nutr*, 120(8), 872-880.  
629 doi:10.1017/S0007114518001563
- 630 Tissenbaum, H. A. (2018). DAF-16: FOXO in the Context of *C. elegans*. *Curr Top Dev Biol*, 127, 1-21.  
631 doi:10.1016/bs.ctdb.2017.11.007
- 632 Tomita, S., Saito, K., Nakamura, T., Sekiyama, Y., & Kikuchi, J. (2017). Rapid discrimination of strain-  
633 dependent fermentation characteristics among *Lactobacillus* strains by NMR-based metabolomics  
634 of fermented vegetable juice. *PLoS ONE*, 12(7), e0182229. doi:10.1371/journal.pone.0182229
- 635 Tsalik, E. L., & Hobert, O. (2003). Functional mapping of neurons that control locomotory behavior in  
636 *Caenorhabditis elegans*. *J Neurobiol*, 56(2), 178-197. doi:10.1002/neu.10245
- 637 Vauzour, D., Camprubi-Robles, M., Miquel-Kergoat, S., Andres-Lacueva, C., Banati, D., Barberger-  
638 Gateau, P., . . . Ramirez, M. (2017). Nutrition for the ageing brain: Towards evidence for an  
639 optimal diet. *Ageing Res Rev*, 35, 222-240. doi:10.1016/j.arr.2016.09.010
- 640 Virk, B., Correia, G., Dixon, D. P., Feyst, I., Jia, J., Oberleitner, N., . . . Weinkove, D. (2012). Excessive  
641 folate synthesis limits lifespan in the *C. elegans*: *E. coli* aging model. *BMC Biol*, 10, 67.  
642 doi:10.1186/1741-7007-10-67

- 643 Vohra, M., Lemieux, G. A., Lin, L., & Ashrafi, K. (2017). The beneficial effects of dietary restriction on  
644 learning are distinct from its effects on longevity and mediated by depletion of a neuroinhibitory  
645 metabolite. *PLoS Biol*, *15*(8), e2002032. doi:10.1371/journal.pbio.2002032
- 646 Vohra, M., Lemieux, G. A., Lin, L., & Ashrafi, K. (2018). Kynurenic acid accumulation underlies  
647 learning and memory impairment associated with aging. *Genes Dev*, *32*(1), 14-19.  
648 doi:10.1101/gad.307918.117
- 649 Wang, S., Ahmadi, S., Nagpal, R., Jain, S., Mishra, S. P., Kavanagh, K., . . . Yadav, H. (2020).  
650 Lipoteichoic acid from the cell wall of a heat killed *Lactobacillus paracasei* D3-5 ameliorates  
651 aging-related leaky gut, inflammation and improves physical and cognitive functions: from *C.*  
652 *elegans* to mice. *Geroscience*, *42*(1), 333-352. doi:10.1007/s11357-019-00137-4
- 653 Watson, E., MacNeil, L. T., Ritter, A. D., Yilmaz, L. S., Rosebrock, A. P., Caudy, A. A., & Walhout, A.  
654 J. (2014). Interspecies systems biology uncovers metabolites affecting *C. elegans* gene expression  
655 and life history traits. *Cell*, *156*(4), 759-770. doi:10.1016/j.cell.2014.01.047
- 656 White, J. G., Southgate, E., Thomson, J. N., & Brenner, S. (1986). The structure of the nervous-system of  
657 the nematode *Caenorhabditis elegans*. *Philosophical Transactions of the Royal Society of London*  
658 *Series B-Biological Sciences*, *314*(1165), 1-340.
- 659 Wolff, S., & Dillin, A. (2006). The trifecta of aging in *Caenorhabditis elegans*. *Exp Gerontol*, *41*(10),  
660 894-903. doi:10.1016/j.exger.2006.06.054
- 661 Zhang, F., Berg, M., Dierking, K., Felix, M. A., Shapira, M., Samuel, B. S., & Schulenburg, H. (2017).  
662 *Caenorhabditis elegans* as a Model for Microbiome Research. *Front Microbiol*, *8*, 485.  
663 doi:10.3389/fmicb.2017.00485
- 664 Zhao, L., Zhao, Y., Liu, R., Zheng, X., Zhang, M., Guo, H., . . . Ren, F. (2017). The Transcription Factor  
665 DAF-16 is Essential for Increased Longevity in *C. elegans* Exposed to *Bifidobacterium longum*  
666 BB68. *Sci Rep*, *7*(1), 7408. doi:10.1038/s41598-017-07974-3

- 667 Zhao, Y., Zhao, L., Zheng, X., Fu, T., Guo, H., & Ren, F. (2013). *Lactobacillus salivarius* strain FDB89  
668 induced longevity in *Caenorhabditis elegans* by dietary restriction. *J Microbiol*, *51*(2), 183-188.  
669 doi:10.1007/s12275-013-2076-2
- 670 Zhou, J. J., Chun, L., & Liu, J. F. (2019). A Comprehensive Understanding of Dietary Effects on *C.*  
671 *elegans* Physiology. *Curr Med Sci*, *39*(5), 679-684. doi:10.1007/s11596-019-2091-6
- 672 Zhou, M., Yu, H., Yin, X., Sabour, P. M., Chen, W., & Gong, J. (2014). *Lactobacillus zae* protects  
673 *Caenorhabditis elegans* from enterotoxigenic *Escherichia coli*-caused death by inhibiting  
674 enterotoxin gene expression of the pathogen. *PLoS ONE*, *9*(2), e89004.  
675 doi:10.1371/journal.pone.0089004
- 676

677 **Figure legends**

678 **Figure 1 Thermotaxis performance declines with age**

679 (A) Schematic of thermotaxis assay. Worms are placed at light blue circles on a thermal gradient without  
680 food. The pink rectangle indicates the sections around the  $T_{cult}$ . The number of worms in each section  
681 after one hour was used to calculate the performance index using the indicated formula. (B and C) Age-  
682 dependent changes in thermotaxis behavior. D1 and D5 worms were cultivated at 20 °C and placed at the  
683 center of 14-20 or 20-26 °C gradient. (B) and (C) indicate distributions of worms (pink rectangle: the  
684 sections around the  $T_{cult}$ ) and box plots of performance indices, respectively. Numbers of experiments are  
685 shown. Statistics: Student's t-test compared to D1 adults. \*\* $p < 0.01$ , \*\*\* $p < 0.001$ ; ns,  $p > 0.05$ . (D) Box  
686 plots of performance indices of worms at different ages. Numbers of experiments are shown. Statistics:  
687 One-way ANOVA followed by Dunnett's multiple comparison test compared to D1 adults. \*\* $p < 0.01$ ,  
688 \*\*\* $p < 0.001$ ; ns,  $p > 0.05$ .

689

690 **Figure 2 LAB screen for thermotaxis in aged worms**

691 (A) Schematic of the screening procedure. Worms were cultivated at 23 °C with *E. coli* until D1 and  
692 transferred to new *E. coli* or LAB plates every day. At D5, worms were subjected to thermotaxis assay  
693 with a thermal gradient of 17-23 °C. (B) Box plots comparing performance indices of D5 worms fed LAB  
694 to those of D1 (pink dashed line) and D5 worms (light blue dashed line) fed *E. coli*. Not applicable (NA)  
695 indicates that worms fed those LAB were not subjected to the assay because they were sick or dead.  
696 Abbreviations: B, *Bifidobacterium*; Lb, *Lactobacillus*; Lc, *Lactococcus*; Ls, *Leuconostoc*; P,  
697 *Pediococcus*; S, *Streptococcus*. Numbers of experiments are shown. Statistics: One-way ANOVA  
698 followed by Dunnett's multiple comparison test compared to D5 adults fed *E. coli*, \*\*\* $p < 0.001$ ;  
699 \*\* $p < 0.01$ ; \* $p < 0.05$ .

700

701 **Figure 3 Aged worms fed LAB remembers new  $T_{cult}$**

702 (A and B) The distribution of worms fed indicated bacteria are shown. Pink rectangles indicate the  
703 sections around the  $T_{\text{cult}}$ . (A) Worms were cultivated at 23 °C and placed at the center of the 17-23 °C  
704 gradient. (B) Temperature shift assay.  $T_{\text{cult}}$  was shifted from 23 °C to 17 °C one day before the assay.  
705 Worms were placed at the center of the 17-23 °C gradient. (C) Box plots summarizing thermotaxis  
706 indices corresponding to (A) and (B). Numbers of experiments are shown. Statistics: One-way ANOVA  
707 followed by Dunnett's multiple comparison test compared to D5 adults fed *E. coli*, \*\*\* $p < 0.001$ ;  
708 \*\* $p < 0.01$ ; \* $p < 0.05$ ; ns,  $p > 0.05$ . Student's t-test for comparison between  $T_{\text{cult}}=23$  °C and  $T_{\text{cult}}=17$  °C →  
709 17 °C, ### $p < 0.001$ ; ## $p < 0.01$ ; # $p < 0.05$ ; ns,  $p > 0.05$ .

710

#### 711 **Figure 4 Aged worms sense food normally**

712 (A) Box plots show performance indices of worms fed indicated bacteria and cultivated at 23 °C. Aged  
713 worms were transferred every day to new plates from D1. Numbers of experiments are shown. Statistics:  
714 One-way ANOVA followed by Dunnett's multiple comparison test compared to D5 adults fed *E. coli*,  
715 \*\*\* $p < 0.001$ ; ns,  $p > 0.05$ . (B and C) Food recognition assays of D1 in (B) and D5 adults in (C). Worms  
716 were pre-conditioned with or without *E. coli* and assayed on plates with or without *E. coli*. Worms  
717 locomotion was evaluated by body bends in 20 sec. The presence of food on the assay plate slows down  
718 the locomotion of well-fed worms (basal slowing response). Pre-conditioning worms without food  
719 enhanced the basal slowing response (enhanced slowing response). The numbers of worms examined are  
720 shown. Error bars: S.E.M. Statistics: Two-way ANOVA with Turkey's multiple comparison test,  
721 \*\*\* $p < 0.001$ ; \*\* $p < 0.01$ ; ns,  $p > 0.05$ .

722

#### 723 **Figure 5 LAB show various effects on locomotion and lifespan**

724 Worms were fed indicated bacteria from D1. (A) Survival curves of worms fed indicated LAB are shown  
725 with control worms fed *E. coli*. NGM plates without peptone were used to avoid the undesired growth of  
726 *E. coli* on LAB plates.  $n=4$  experiments with 25 worms/experiment. Statistics: Log-rank test.  $p$  values are  
727 shown. (B and C) The number of thrashes in liquid (B) and distance of migration in three minutes on

728 plates with food (C) were measured to quantitate the locomotion of aged worms. The numbers of worms  
729 are shown in bars. Error bars: S.E.M. Statistics: One-way ANOVA followed by Dunnett's multiple  
730 comparison test compared to D5 fed *E. coli*,  $p^{***}<0.001$ ; ns,  $p>0.05$ .

731

732 **Figure 6 *Lactobacilli* in a clade are associated with high thermotaxis performance of aged worms**

733 (A) Phylogenetic tree of LAB based on 16S rRNA is shown with fermentation mode and heatmap of  
734 performance indices of aged worms fed indicated LAB from D1. Bootstrap values are indicated at each  
735 node on the phylogenetic tree. Fermentation modes were categorized based on previous studies (see Table  
736 S1). For performance indices, the same data as Figure 2A were used. NA in the performance indices  
737 heatmap indicates that worms fed those LAB were not subjected to the assay because they were sick or  
738 dead. Fermentation mode indicates obligatory hetero- (green), facultatively hetero- (light green), and  
739 obligatory homofermentative (orange) LAB. (B) Performance indices are shown for clades of LAB. Each  
740 dot indicates one LAB species. *Lactobacillus* is separated into two clades, A and B as shown in (A).  
741 Statistics: The mean indices marked with distinct alphabets are significantly different ( $p < 0.001$ )  
742 according to One-way ANOVA followed by Tukey–Kramer test. (C) Box plots summarizing performance  
743 indices of aged worms fed either live or dead bacteria. Numbers of experiments are shown. Statistics: The  
744 mean indices marked with distinct alphabets are significantly different ( $p < 0.05$ ) according to One-way  
745 ANOVA followed by Tukey–Kramer test.

746

747 **Figure 7 *daf-16* is involved in the effect of *Lb. reuteri* on thermotaxis in aged worms**

748 (A) Expression of *pha-4* transcripts in aged worms fed indicated LAB relative to aged worms fed *E. coli*.  
749 (B) Box plots summarizing thermotaxis indices of wild type and *eat-2* mutant worms cultivated at 23 °C  
750 with *E. coli*. Numbers of experiments are shown. Statistics: Student's t-test, ns,  $p>0.05$ . (C-E) Worms  
751 with indicated genotypes were cultivated at 23 °C with *E. coli* or *Lb. reuteri*. (C) Box plots summarizing  
752 performance indices. Numbers of experiments are shown. Statistics: One-way ANOVA followed by  
753 Dunnett's multiple comparison test compared to the D1 control for each condition,  $p^{***}<0.001$ ; ns,



754  $p > 0.05$ . (D) Distribution of worms. Pink rectangles indicate the sections around the  $T_{\text{cult}}$ . (E) Survival  
755 curves. NGM plates without peptone were used.  $n=4$  experiments with 25 worms/experiment. Statistics:  
756 Log-rank test,  $p^{***} < 0.001$ ; ns,  $p > 0.05$ .

757 **Supplementary information**

758 **Supplementary Figure Legends**

759 **Figure S1 Survival curve of worms cultivated at different temperature**

760 Survival curves of worms cultivated at the indicated temperature from eggs. Worms were fed *E. coli* on  
761 NGM plates. n=4 experiments with 25 worms/experiment. Statistics: Log-rank test,  $p^{***}<0.001$ .

762

763 **Figure S2 Distributions of worms on the temperature gradient at different age**

764 Worms were cultivated at 23 °C and placed at the center of the 17-23 °C gradient. The distributions of  
765 worms were shown. Pink rectangles indicate the sections around the  $T_{cult}$ .

766

767 **Figure S3 Worms fed select LAB were not thermophilic**

768 Worms were cultivated at 23 °C and placed at the center of 20-26 °C gradient. (A) Distribution of worms  
769 fed indicated bacteria. Pink rectangles indicate the sections around the  $T_{cult}$ . (B) Box plots summarizing  
770 thermotaxis indices of aged worms fed indicated conditions. Numbers of experiments are shown.

771 Statistics: The mean indices marked with distinct alphabets are significantly different ( $p < 0.05$ ) according  
772 to One-way ANOVA followed by Tukey–Kramer test.

773

774 **Figure S4 Peptone-free plates do not affect the beneficial effect of *Lb. reuteri***

775 Box plots comparing performance indices between worms cultivated on NGM plates without peptone.  
776 Worms were cultivated at 23 °C with *E. coli* or *Lb. reuteri*. Numbers of experiments are shown. Statistics:  
777 One-way ANOVA followed by Dunnett’s multiple comparison test compared to the D1 control for each  
778 condition,  $p^{***}<0.001$ ; ns,  $p>0.05$ .

779

780 **Figure S5 Images of Gram-stained bacteria**

781 Representative images of Gram-stained *E. coli* and select LAB. *E. coli* and LAB are Gram-negative and  
782 positive, respectively. Scale bar: 10  $\mu\text{m}$ .

783

784 **Table S1 List of LAB strains**

785

786

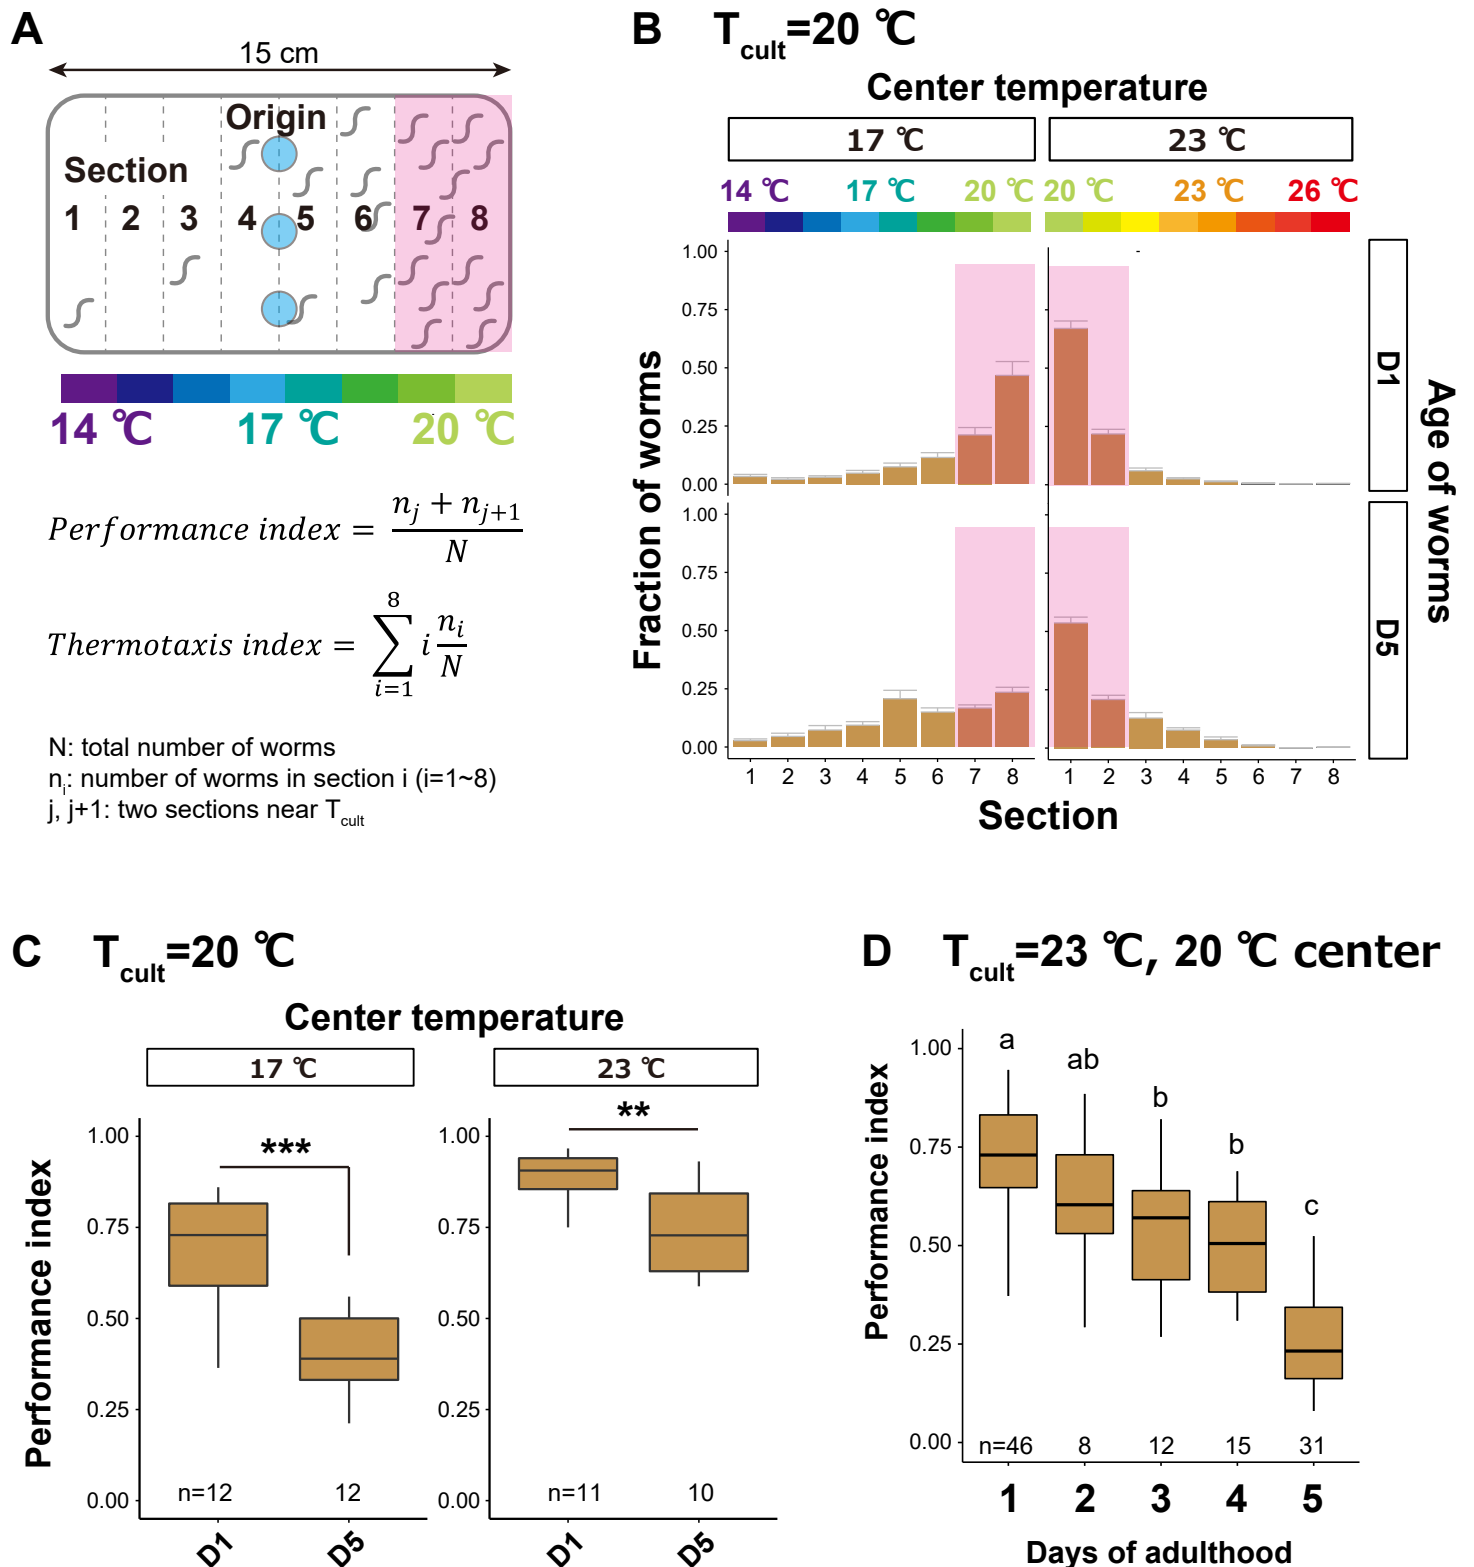

**Figure 1 Thermotaxis performance declines with age**

(A) Schematic of thermotaxis assay. Worms are placed at light blue circles on a thermal gradient without food. Pink rectangle indicates the sections around the  $T_{\text{cult}}$ . Number of worms in each section after one hour was used to calculate the performance index using the formula. (B and C) Age-dependent changes in thermotaxis behavior. D1 and D5 worms were cultivated at 20 °C and placed at the center of 14-20 or 20-26 °C gradient. (B) and (C) indicate distributions of worms (pink rectangle: the sections around the  $T_{\text{cult}}$ ) and box plots of performance indices, respectively. Numbers of experiments are shown. Statistics: Student's t-test compared to D1 adults. \*\* $p < 0.01$ , \*\*\* $p < 0.001$ ; ns,  $p > 0.05$ . (D) Box plots of performance indices of worms at different ages. Numbers of experiments are shown. Statistics: One-way ANOVA followed by Dunnett's multiple comparison test compared to D1 adults. \*\* $p < 0.01$ , \*\*\* $p < 0.001$ ; ns,  $p > 0.05$ .

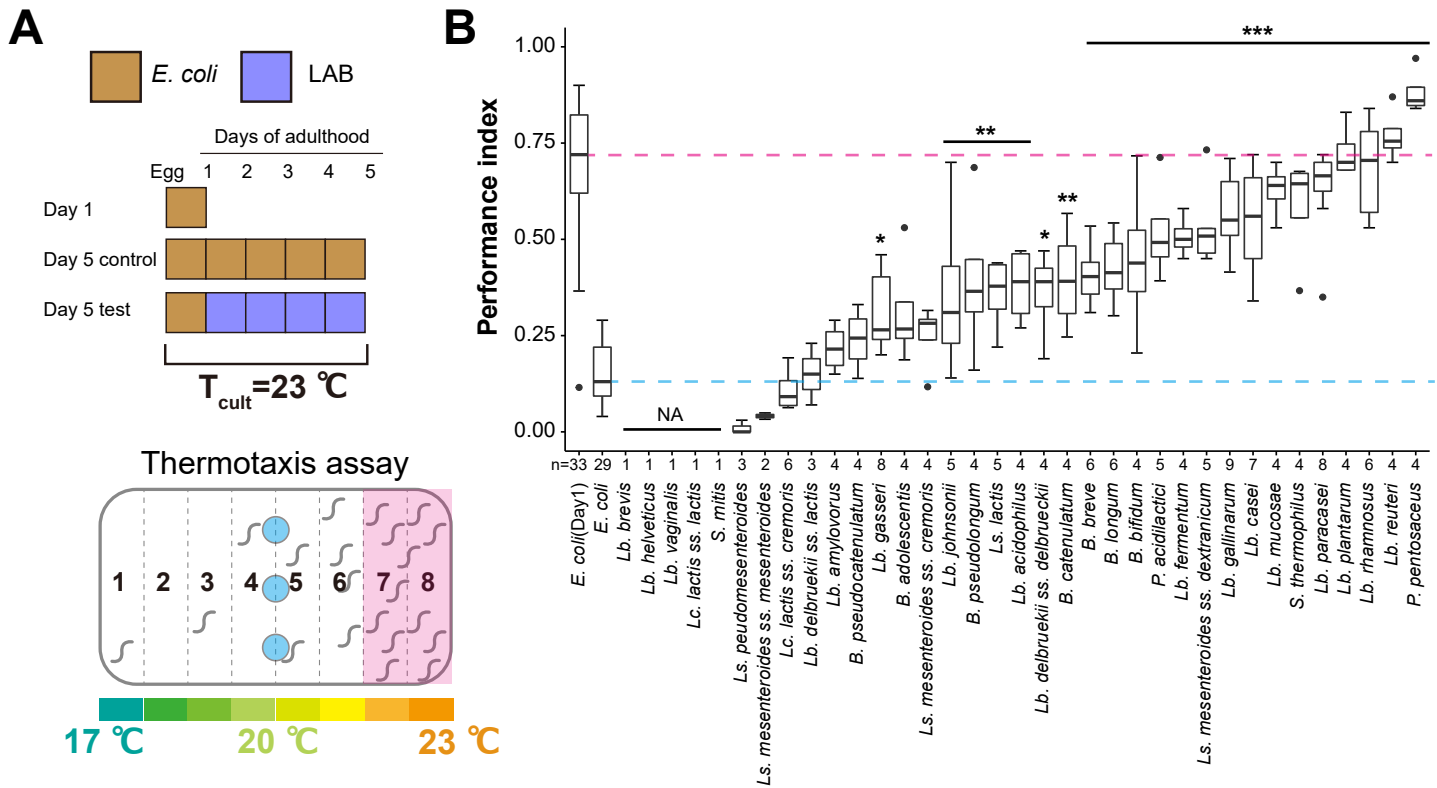

**Figure 2 LAB screen for thermotaxis in aged worms**

(A) Schematic of screening procedure. Worms were cultivated at 23 °C with *E. coli* until D1 and transferred to new *E. coli* or LAB plates every day. At D5, worms were subjected to thermotaxis assay with a thermal gradient of 17-23 °C. (B) Box plots comparing performance indices of D5 worms fed LAB to those of D1 (pink dashed line) and D5 worms (light blue dashed line) fed *E. coli*. Not applicable (NA) indicates that worms fed those LAB were not subjected to the assay because they were sick or dead. Abbreviations: B, *Bifidobacterium*; Lb, *Lactobacillus*; Lc: *Lactococcus*; Ls, *Leuconostoc*; P, *Pediococcus*; S, *Streptococcus*. Numbers of experiments are shown. Statistics: One-way ANOVA followed by Dunnett' s multiple comparison test compared to D5 adults fed *E. coli*, \*\*\*p<0.001; \*\*p<0.01; \*p<0.05.

**A**  $T_{cult} = 23\text{ }^{\circ}\text{C}$ , 20  $^{\circ}\text{C}$  center

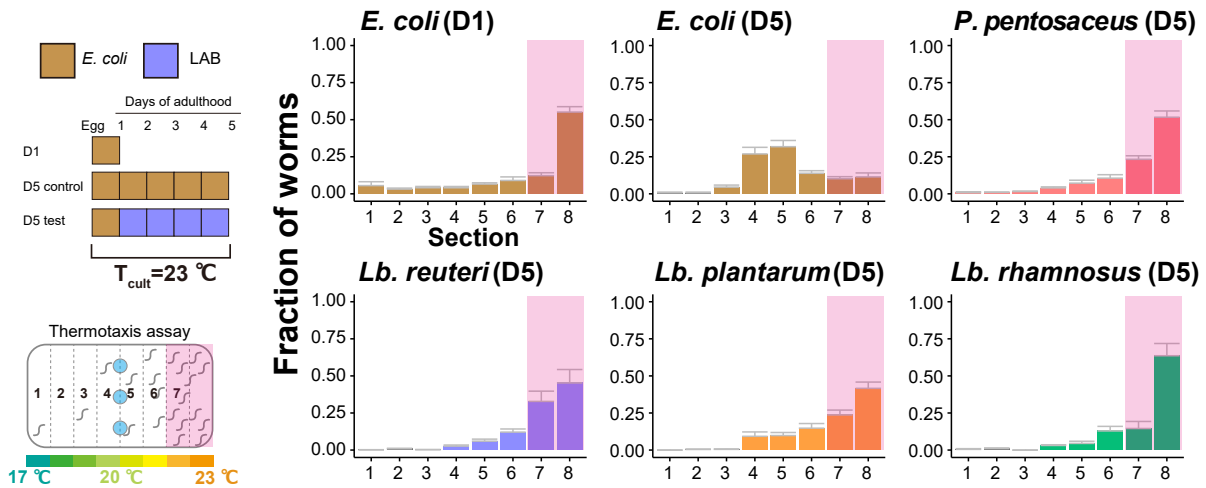

**B**  $T_{cult} = 23\text{ }^{\circ}\text{C} \rightarrow 17\text{ }^{\circ}\text{C}$ , 20  $^{\circ}\text{C}$  center

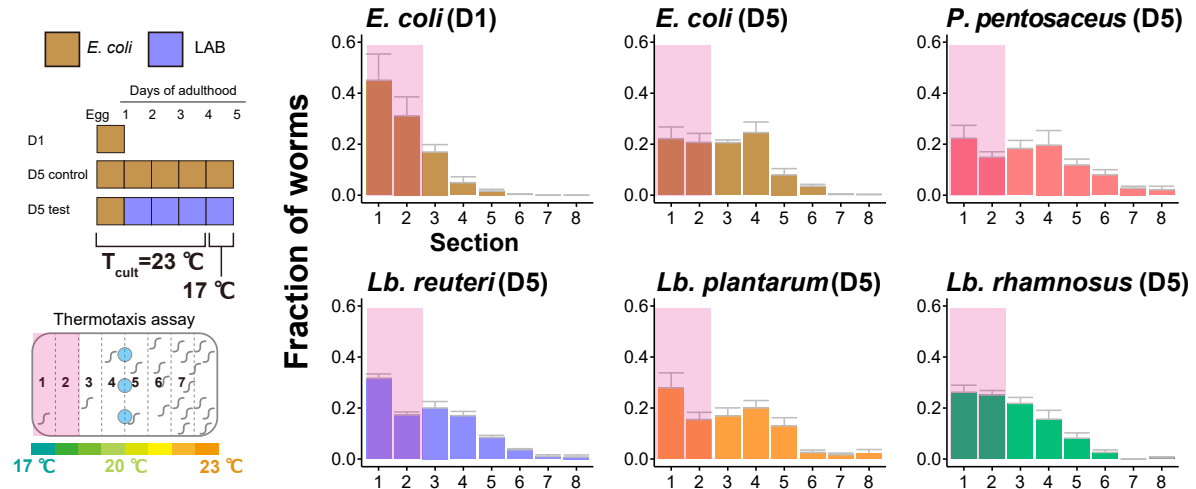

**C**

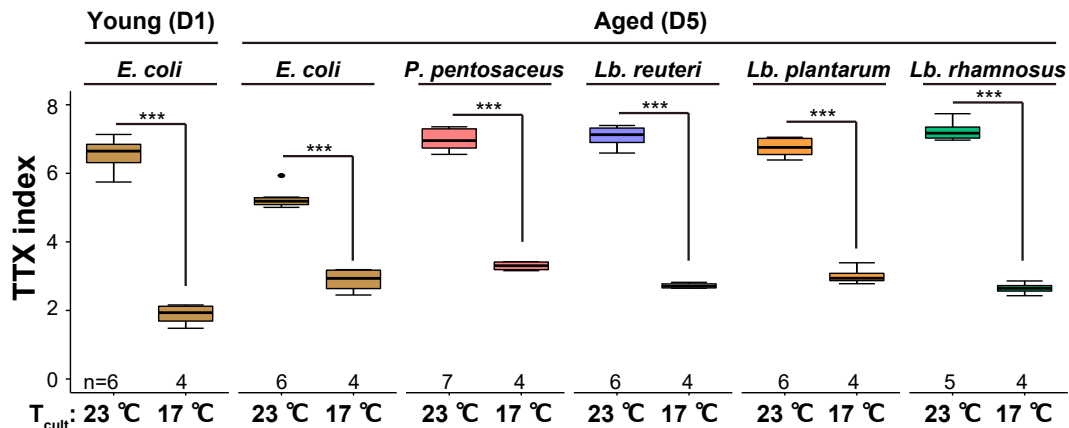

**Figure 3 Aged worms fed LAB remembers new  $T_{cult}$**

(A and B) Distribution of worms fed indicated bacteria are shown. Pink rectangles indicate the sections around the  $T_{cult}$ . (A) Worms were cultivated at 23  $^{\circ}\text{C}$  and placed at the center of 17-23  $^{\circ}\text{C}$  gradient. (B) Temperature shift assay.  $T_{cult}$  was shifted from 23  $^{\circ}\text{C}$  to 17  $^{\circ}\text{C}$  one day before the assay. Worms were placed at the center of 17-23  $^{\circ}\text{C}$  gradient. (C) Box plots summarizing thermotaxis indices corresponding to (A) and (B). Numbers of experiments are shown. Statistics: One-way ANOVA followed by Dunnett's multiple comparison test compared to D5 adults fed E. coli, \*\*\* $p < 0.001$ ; \*\* $p < 0.01$ ; \* $p < 0.05$ ; ns,  $p > 0.05$ . Student's t-test for comparison between  $T_{cult} = 23\text{ }^{\circ}\text{C}$  and  $T_{cult} = 23\text{ }^{\circ}\text{C} \rightarrow 17\text{ }^{\circ}\text{C}$ , ### $p < 0.001$ ; ## $p < 0.01$ ; # $p < 0.05$ ; ns,  $p > 0.05$ .

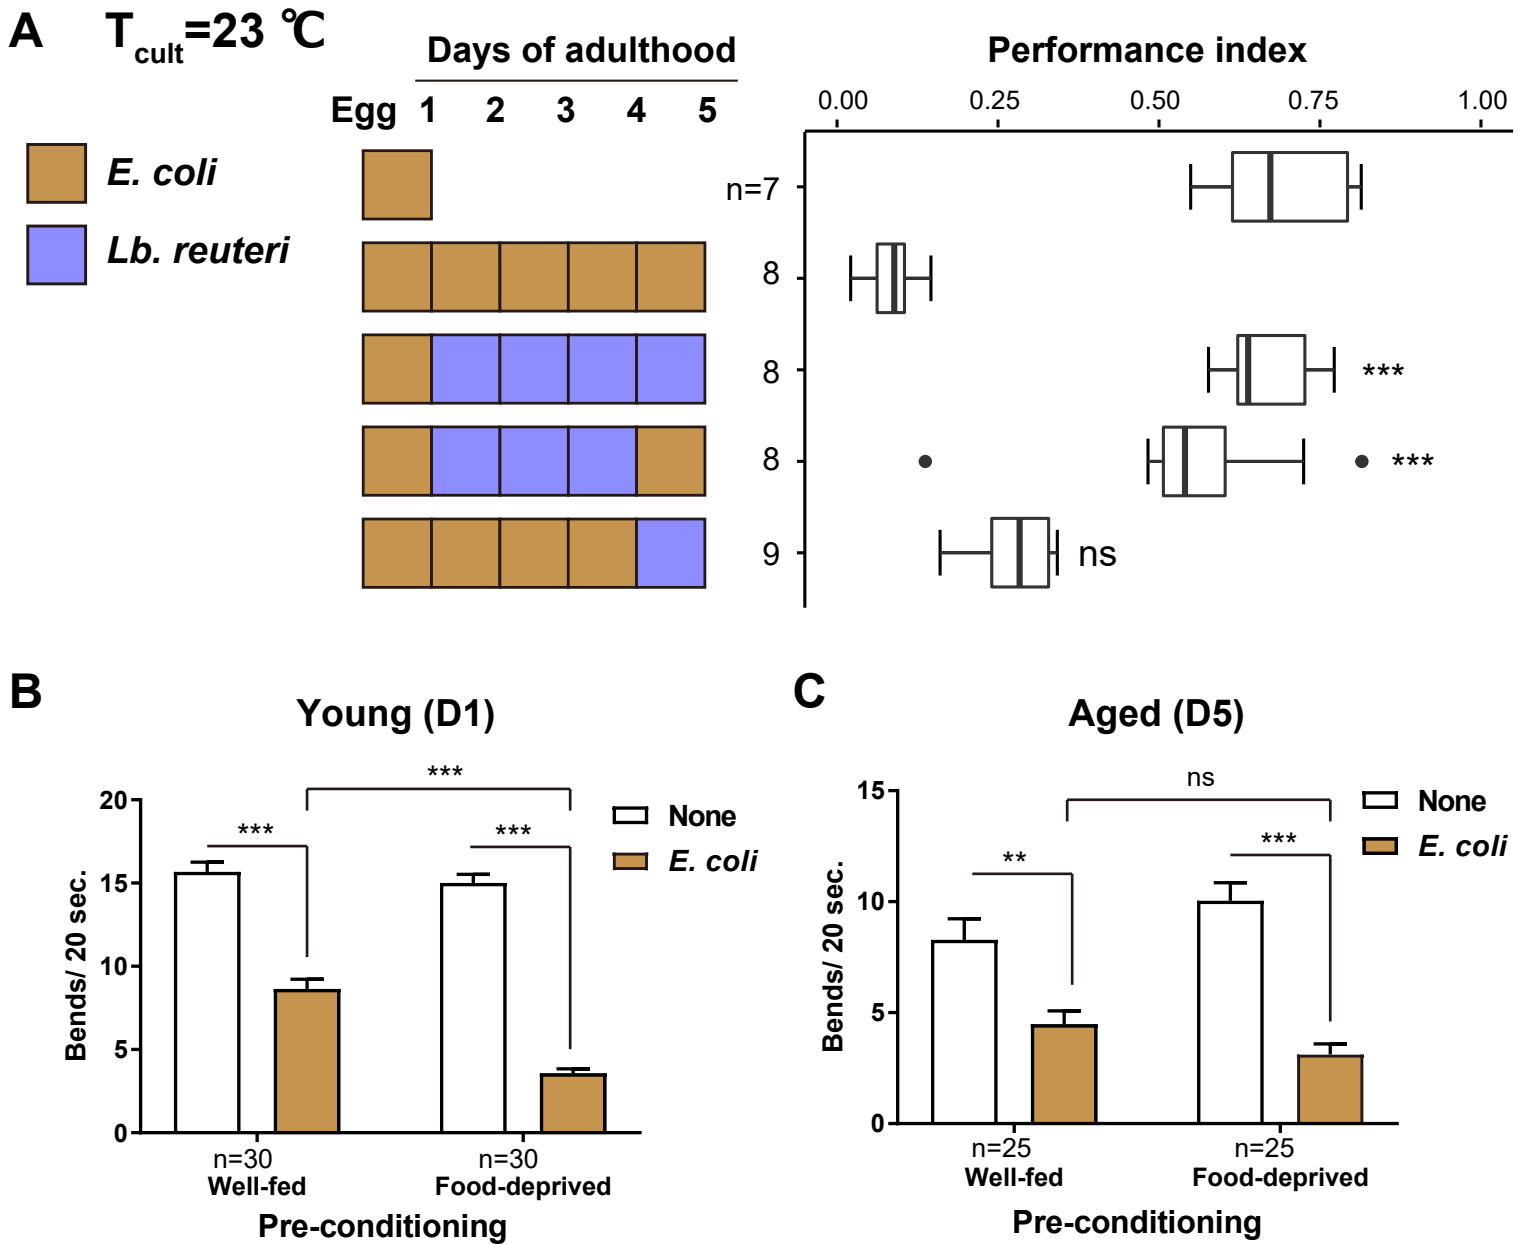

**Figure 4 Aged worms sense food normally**

(A) Box plots show performance indices of worms fed indicated bacteria and cultivated at 23 °C. Aged worms were transferred every day to new plates from D1. Numbers of experiments are shown. Statistics: One-way ANOVA followed by Dunnett' s multiple comparison test compared to D5 adults fed *E. coli*, \*\*\* $p < 0.001$ ; ns,  $p > 0.05$ . (B and C) Food recognition assays of D1 in (B) and D5 adults in (C). Worms were pre-conditioned with or without *E. coli* and assayed on plates with or without *E. coli*. Worms locomotion was evaluated by body bends in 20 sec. Presence of food on assay plate slows down the locomotion of well-fed worms (basal slowing response). Pre-conditioning worms without food enhanced the basal slowing response (enhanced slowing response). Numbers of worms examined are shown. Error bars: S.E.M. Statistics: Two-way ANOVA with Turkey' s multiple comparison test, \*\*\* $p < 0.001$ ; \*\* $p < 0.01$ ; ns,  $p > 0.05$ .

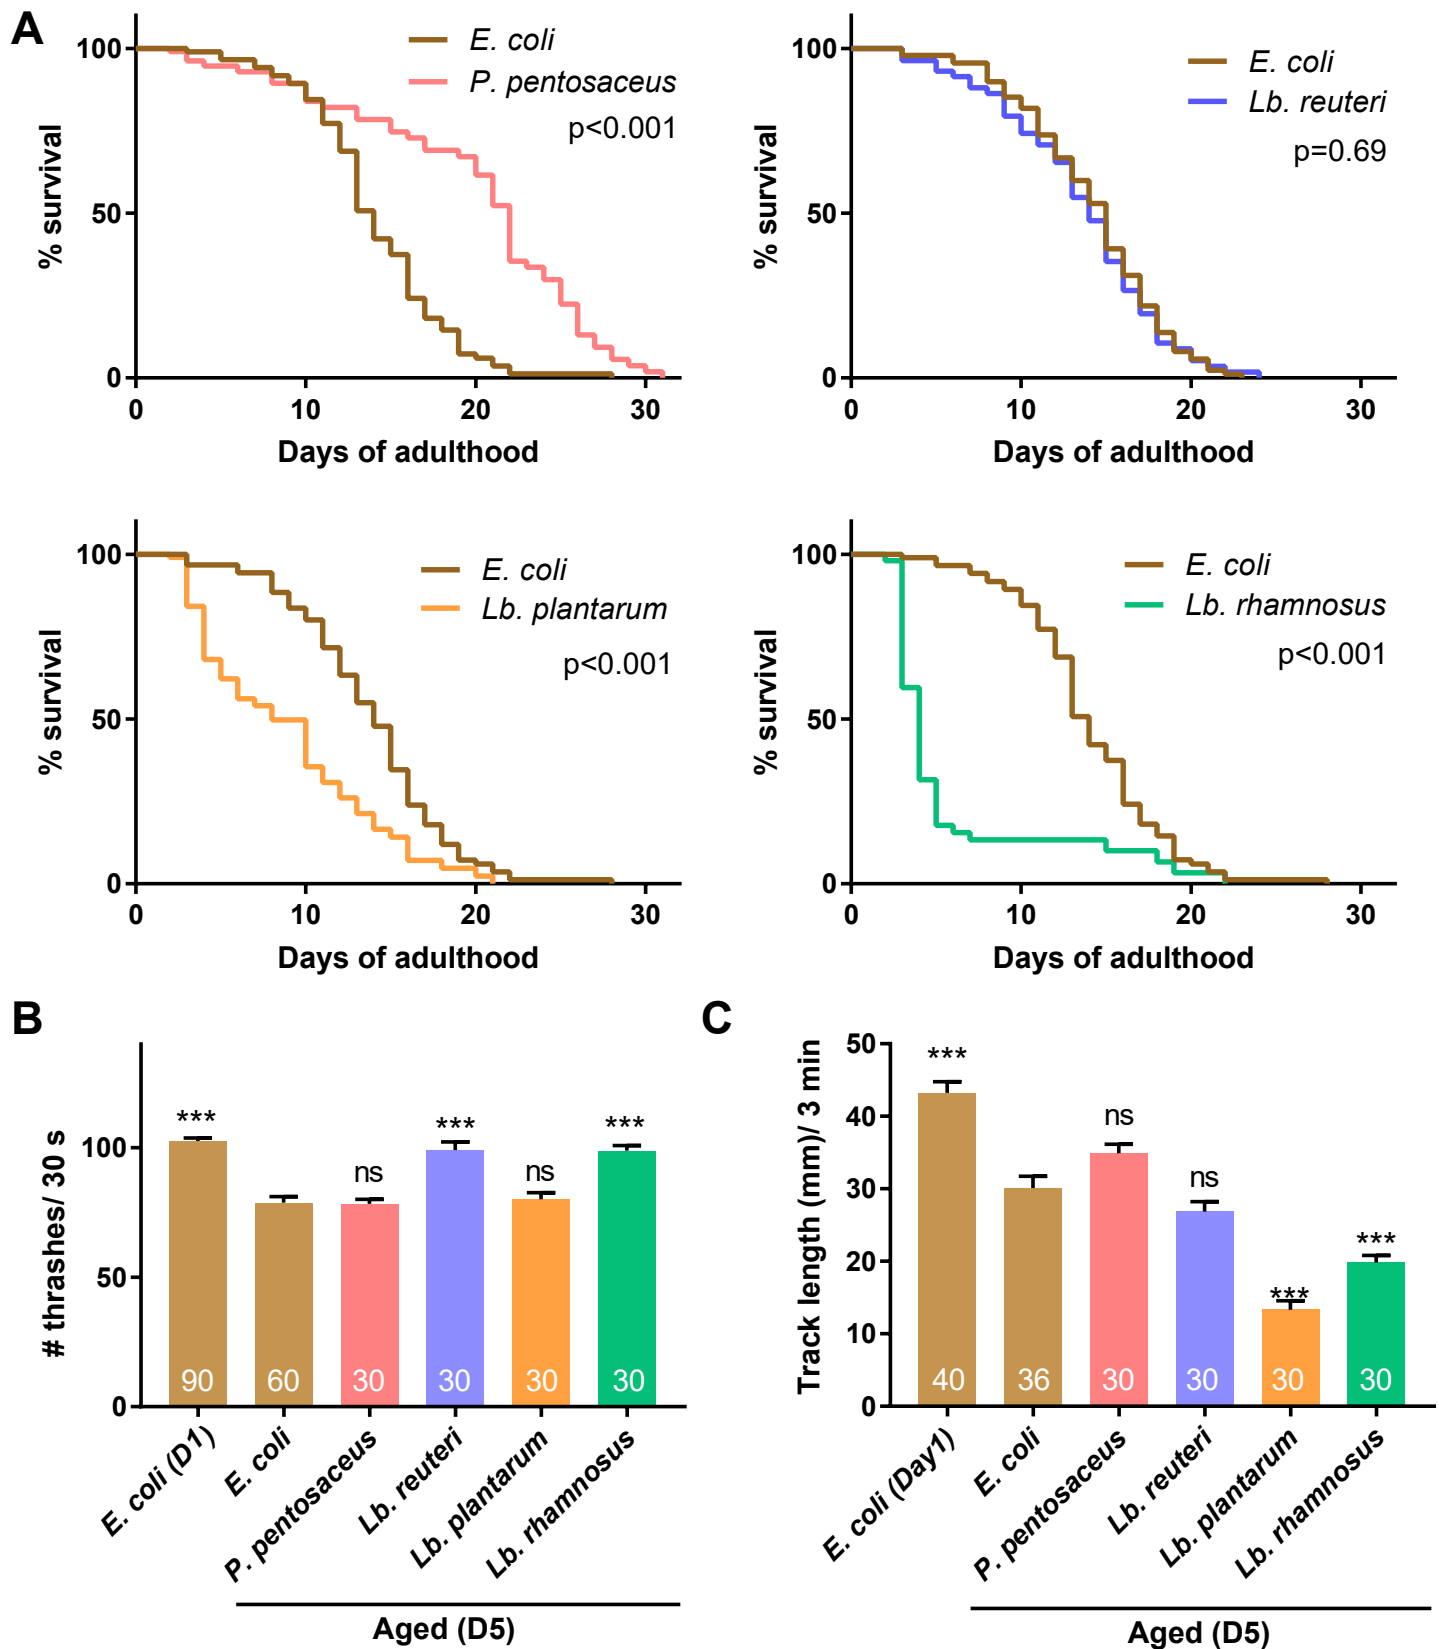

### Figure 5 LAB show various effects on locomotion and lifespan

Worms were fed indicated bacteria from D1. (A) Survival curves of worms fed indicated LAB are shown with control worms fed *E. coli*. NGM plates without peptone were used to avoid undesired growth of *E. coli* on LAB plates.  $n=4$  experiments with 25 worms/experiment. Statistics: Log-rank test.  $p$  values are shown. (B and C) Number of thrashes in liquid (B) and distance of migration in three minutes on plates with food (C) were measured to quantitate locomotion of aged worms. Numbers of worms are shown in bars. Error bars: S.E.M. Statistics: One-way ANOVA followed by Dunnett's multiple comparison test compared to D5 fed *E. coli*,  $p^{***} < 0.001$ ; ns,  $p > 0.05$ .



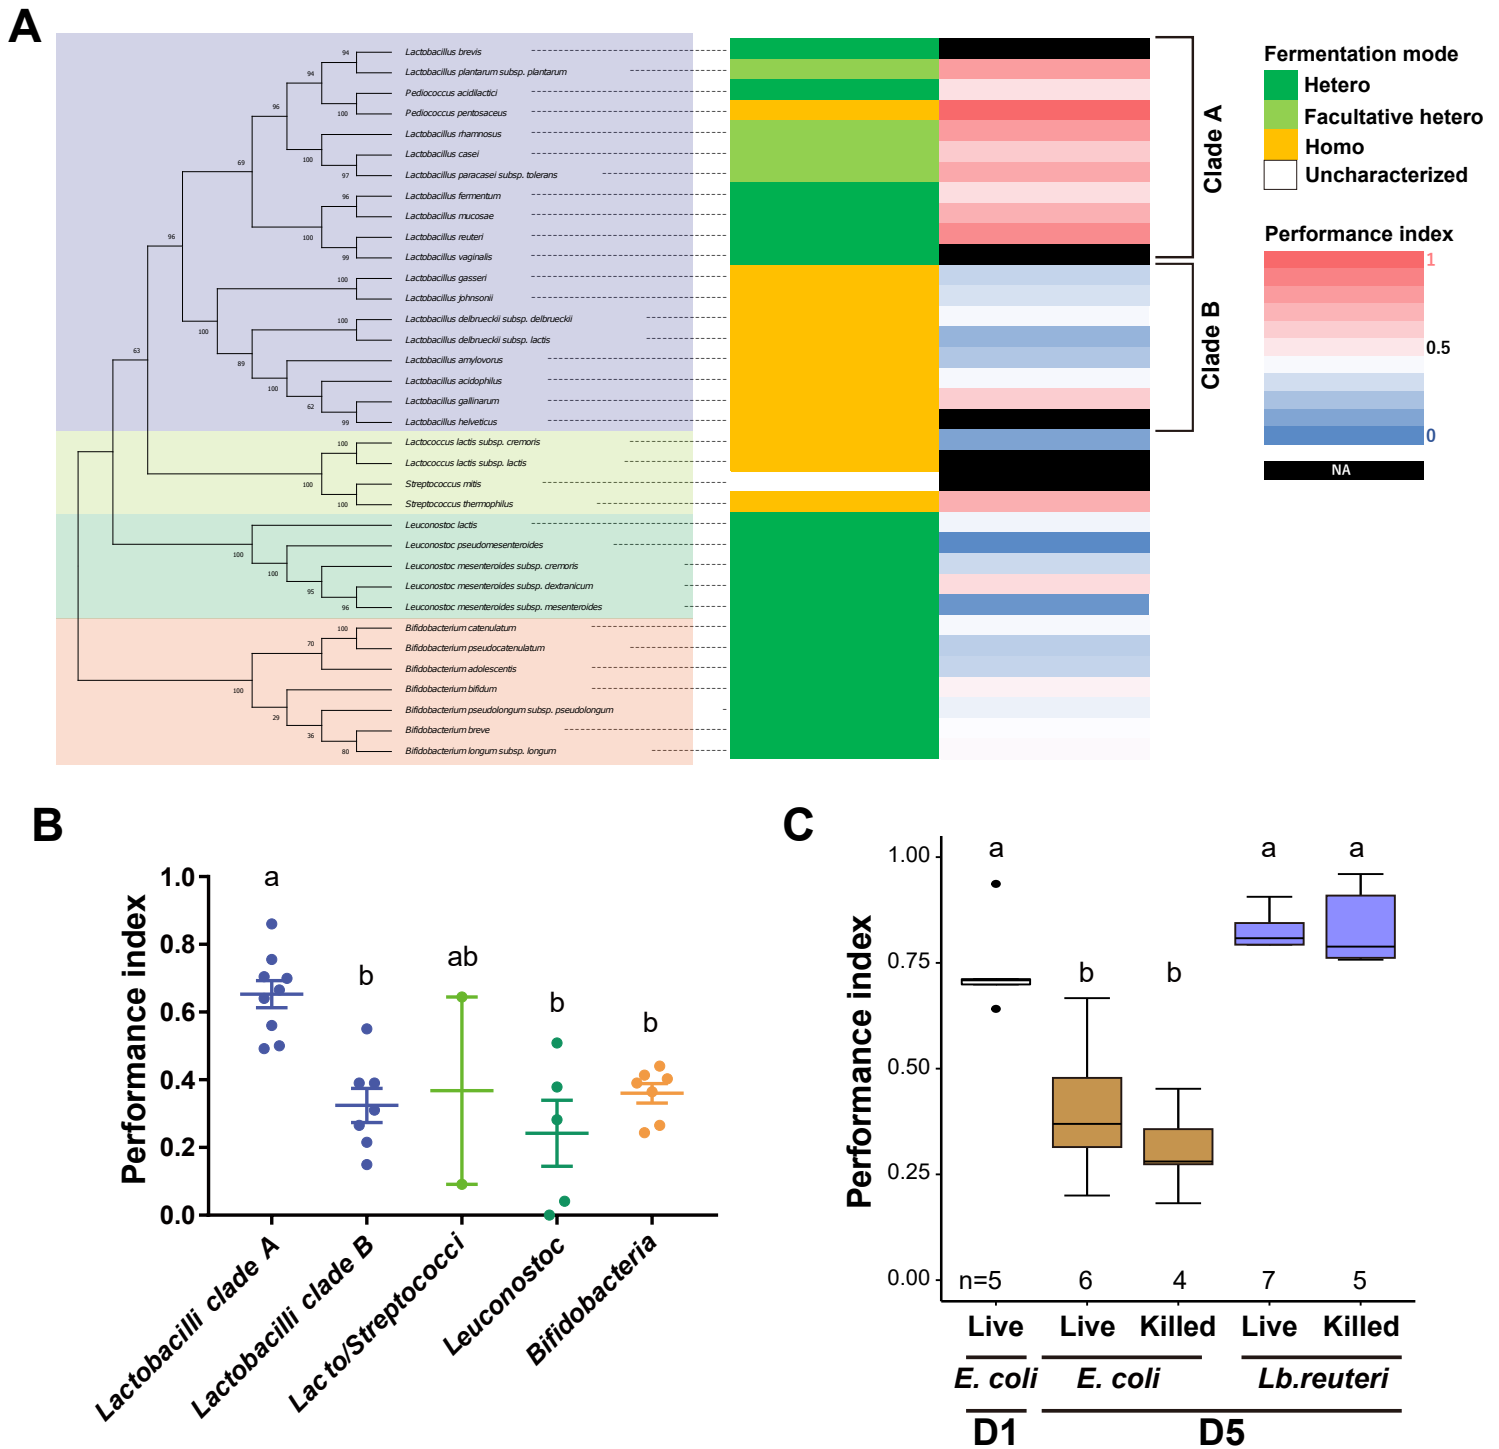

**Figure 6 Lactobacilli in a clade are associated with high thermotaxis performance of aged worms**

(A) Phylogenetic tree of LAB based on 16S rRNA is shown with fermentation mode and heatmap of performance indices of aged worms fed indicated LAB from D1. Bootstrap values are indicated at each node on the phylogenetic tree. Fermentation modes were categorized, based on the previous studies (see Table S1). For performance indices, the same data as Figure 2A were used. NA in the performance indices heatmap indicates that worms fed those LAB were not subjected to the assay because they were sick or dead. Fermentation mode indicates obligatory hetero- (green), facultatively hetero- (light green), and obligatory homofermentative (orange) LAB. (B) Performance indices are shown for clades of LAB. Each dot indicates one LAB species. Lactobacillus is separated into two clades, A and B as shown in (A). Statistics: The mean indices marked with distinct alphabets are significantly different (p < 0.001) according to One-way ANOVA followed by Tukey–Kramer test. (C) Box plots summarizing performance indices of aged worms fed either live or dead bacteria. Numbers of experiments are shown. Statistics: The mean indices marked with distinct alphabets are significantly different (p < 0.05) according to One-way ANOVA followed by Tukey–Kramer test.

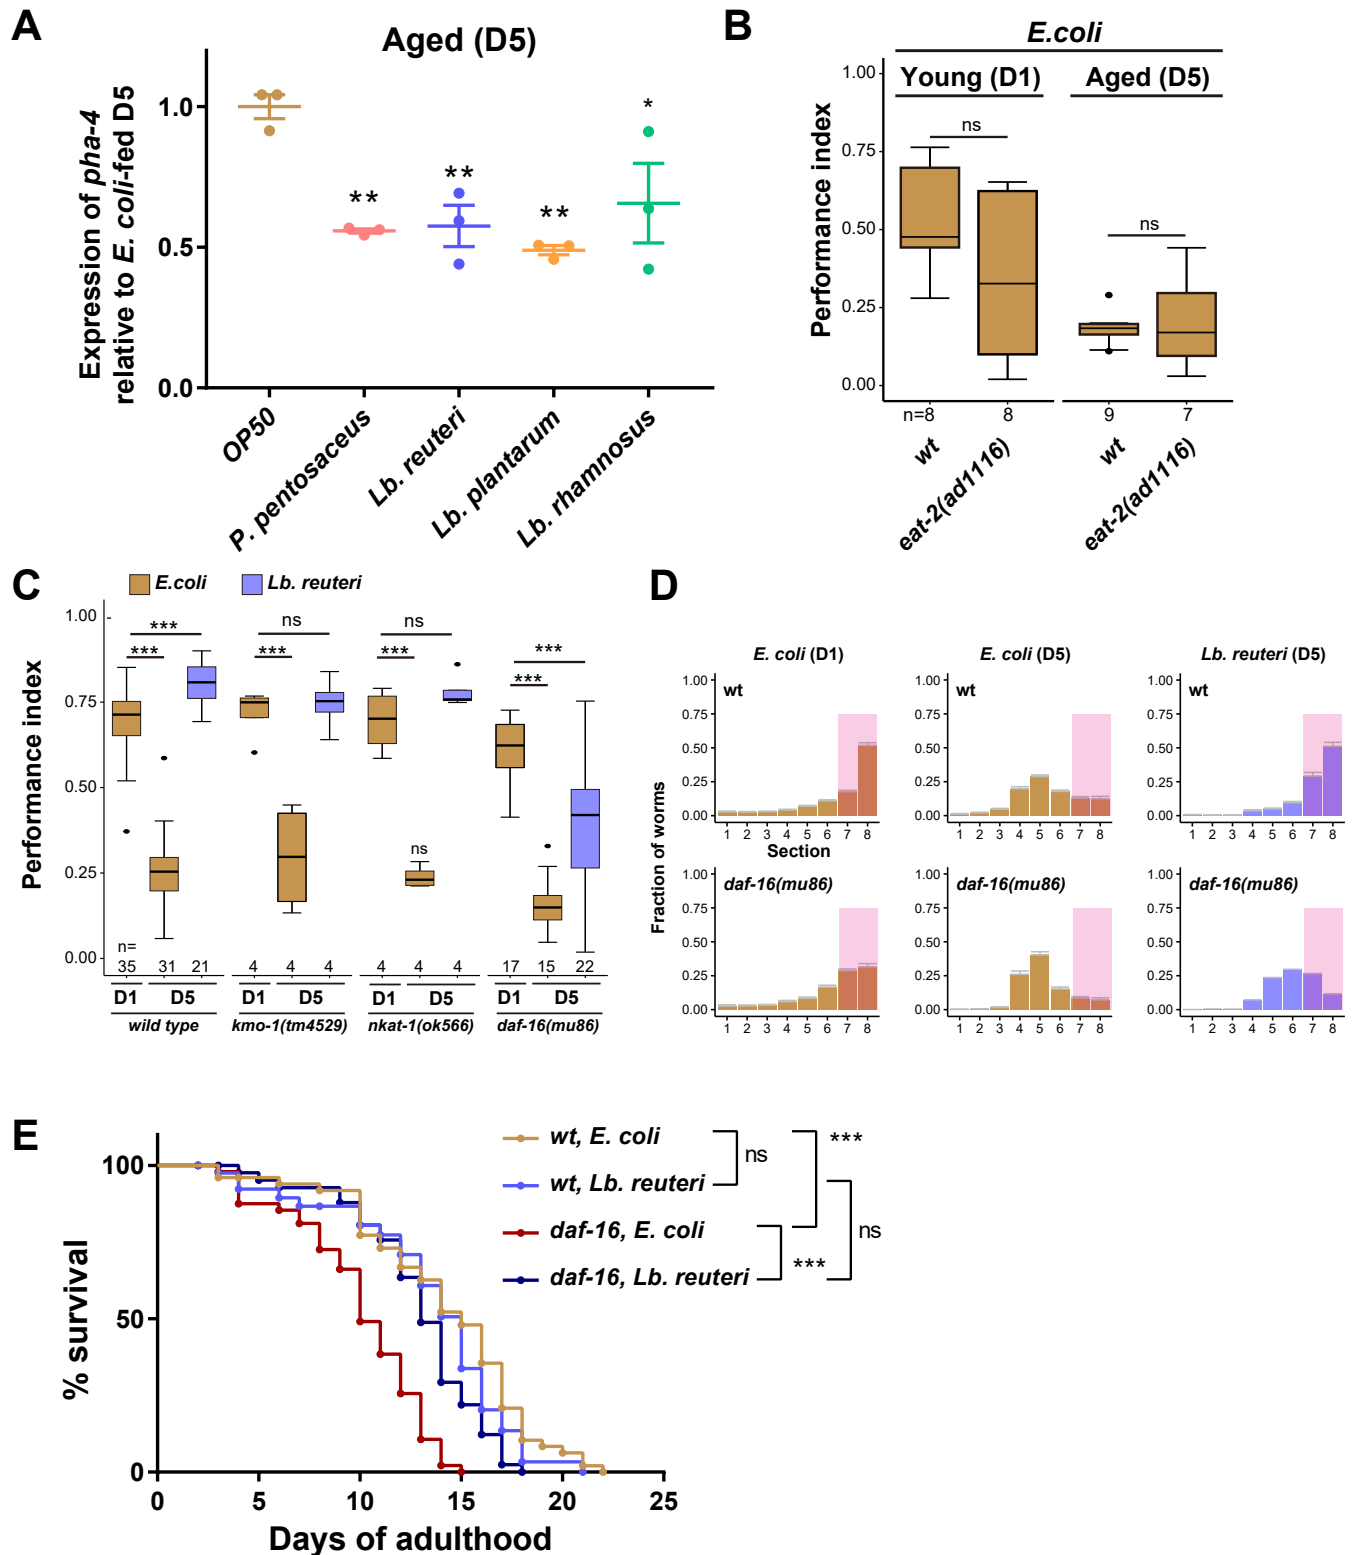

**Figure 7** *daf-16* is involved in the effect of *Lb. reuteri* on thermotaxis in aged worms

(A) Expression of *pha-4* transcripts in aged worms fed indicated LAB relative to aged worms fed *E. coli*. (B) Box plots summarizing thermotaxis indices of wild type and *eat-2* mutant worms cultivated at 23 °C with *E. coli*. Numbers of experiments are shown. Statistics: Student's t-test, ns,  $p > 0.05$ . (C-E) Worms with indicated genotypes were cultivated at 23 °C with *E. coli* or *Lb. reuteri*. (C) Box plots summarizing performance indices. Numbers of experiments are shown. Statistics: One-way ANOVA followed by Dunnett's multiple comparison test compared to the D1 control for each condition,  $p^{***} < 0.001$ ; ns,  $p > 0.05$ . (D) Distribution of worms. Pink rectangles indicate the sections around the Tcult. (E) Survival curves. NGM plates without peptone were used.  $n = 4$  experiments with 25 worms/experiment. Statistics: Log-rank test,  $p^{***} < 0.001$ ; ns,  $p > 0.05$ .
